# Supplementary material for: Efficient Heat Shock Response Affects Hyperthermia-Induced Radiosensitization in a Tumor Spheroid Control Probability Assay
Source: MDPI journal article supplement (doi:10.3390/cancers13133168), 2021-06-25
Supplement: s1 [file s1]

**Table S1. Primers used for the detection and quantification of HSR genes by RT- and qPCR analysis.**

| <b>Target gene</b>            | <b>Primer sequence</b>                                               | <b>Product size</b> |
|-------------------------------|----------------------------------------------------------------------|---------------------|
| <b><i>ACTB</i></b>            | Forward - CACCCTGAAGTACCCCATCG<br>Reverse - GCTGGGGTGTGAAGGTCTC      | 199 bp              |
| <b><i>DNAJB1</i></b>          | Forward - GTCATTTATCCTGCCAGGATCAG<br>Reverse - GTCCCCACGTTTCTCGGGTG  | 185 bp              |
| <b><i>HSF1</i></b>            | Forward - CACAACAACATGGCCAGCTTCG<br>Reverse - CCTGGCGGATCTTTATGTCTTC | 217 bp              |
| <b><i>GADD34/PPP1R15A</i></b> | Forward - GAGACAGAGGAAGAGGAAGCT<br>Reverse - GGAAATGGACAGTGACCTTCTC  | 235 bp              |
| <b><i>HSPA1A/B</i></b>        | Forward - CCAGGTGATCAACGACGGAGAC<br>Reverse - CGATCACACCCGCATCCTTGG  | 218 bp              |
| <b><i>HSPB1</i></b>           | Forward - CGCCATCGAGAGCCCCGCAG<br>Reverse - CTGCCGCTCCTCGTGCTTGC     | 203 bp              |
| <b><i>XBP1</i>*</b>           | Forward - CCTTGTAGTTGAGAACCAGG<br>Reverse - GGGGCTTGGTATATATGTGG     | 442 bp<br>416 bp    |

\*Primers for unspliced and spliced forms of the f *XBP1* gene were according to Yoshida *et al.*, 2001 [44]

**Table S2. List of antibodies used in the study.**

| <b>Antibody</b>                                                              | <b>Source</b>             | <b>Cat. Number</b> |
|------------------------------------------------------------------------------|---------------------------|--------------------|
| Rabbit monoclonal antibody anti-ATF4                                         | Cell Signaling Technology | # 11815S           |
| Mouse monoclonal antibody anti-AKT                                           | Cell Signaling Technology | # 2920S            |
| Rabbit monoclonal antibody anti-Phospho-AKT (Ser475)                         | Cell Signaling Technology | # 4060S            |
| Rabbit monoclonal antibody anti-Phospho-p44/42 MAPK (Erk1/2) (Thr202/Tyr204) | Cell Signaling Technology | # 4370S            |
| Rabbit polyclonal antibody anti-p44/42 MAPK (Erk1/2)                         | Cell Signaling Technology | # 9102S            |
| Rabbit monoclonal antibody anti-Phospho-eIF2alpha (Ser51)                    | Cell Signaling Technology | # 3597S            |
| Rabbit monoclonal antibody anti-cleaved PARP (Asp214)                        | Cell Signaling Technology | #9541S             |
| Rabbit polyclonal antibody anti-LC3B                                         | Cell Signaling Technology | # 4108S            |
| Rabbit monoclonal antibody anti-Phospho-SAPK/JNK (Thr183/Tyr185)             | Cell Signaling Technology | #4668S             |
| Rabbit polyclonal antibody anti-SAPK/JNK                                     | Cell Signaling Technology | #9252S             |
| Rabbit monoclonal antibody anti-Phospho-p38 MAPK (Thr180/Tyr182)             | Cell Signaling Technology | #4511S             |
| Rabbit monoclonal antibody anti-p38 MAPK                                     | Cell Signaling Technology | #8690S             |
| Rabbit monoclonal antibody anti-Phospho-MAPKAPK-2 (Thr334)                   | Cell Signaling Technology | #3007S             |
| Rabbit monoclonal antibody anti-Phospho-c-Jun (Ser73)                        | Cell Signaling Technology | #3270S             |
| Mouse monoclonal antibody anti-HSP70                                         | Cell Signaling Technology | #46477S            |
| Rabbit monoclonal antibody anti-HSP40                                        | Cell Signaling Technology | #4871S             |
| Rabbit monoclonal antibody anti-Phospho-HSP27 (Ser82)                        | Cell Signaling Technology | #9709S             |
| Mouse monoclonal antibody anti-HSP27                                         | Cell Signaling Technology | #2402S             |
| Rabbit polyclonal antibody anti-HSF1                                         | Cell Signaling Technology | #4356S             |
| Rabbit monoclonal antibody anti-Phospho-HSF1 (Ser326)                        | Abcam                     | ab76076            |
| Rabbit polyclonal antibody anti-Phospho-IRE1 alpha (Ser724)                  | Novus                     | NB100-2323         |
| Rabbit monoclonal antibody anti-Phospho-ATM (Ser1981)                        | Cell Signaling Technology | #5883S             |
| Rabbit polyclonal antibody anti-Phospho-ATR (Ser428)                         | Cell Signaling Technology | #2853S             |
| Rabbit monoclonal antibody anti-Phospho-Histone H2A.X (Ser139)               | Cell Signaling Technology | #9718S             |
| Rabbit monoclonal antibody anti-Atg5                                         | Cell Signaling Technology | #9980S             |
| Rabbit monoclonal antibody anti-GAPDH                                        | Santa Cruz Biotechnology  | sc-47724           |

**Table S3. Relative volume growth delay induced in FaDu and SAS spheroids by different doses of HT.** Relative volume growth delay was calculated by dividing the individual time periods required by each treated spheroid to reach 5xV<sub>0</sub> (volume before treatment) by the average time of control spheroids (37 °C) to get to the same endpoint. Values are documented as means ± SD.

| Temperature<br>[°C] | Treatment<br>time [min] | Growth delay (rel.) |           |
|---------------------|-------------------------|---------------------|-----------|
|                     |                         | FaDu                | SAS       |
| 42.5 °C             | 30                      | 1.0 ± 0.1           | 1.0 ± 0.1 |
| 42.5 °C             | 60                      | 1.0 ± 0.1           | 1.2 ± 0.1 |
| 44.5 °C             | 30                      | 1.0 ± 0.1           | 1.5 ± 0.1 |
| 46.5 °C             | 30                      | 1.6 ± 0.4           | 3.3 ± 0.4 |

**Table S4. The TER values calculated individually from two SCP experiments performed for each spheroid type show small interexperimental variability.** Spheroid dose-response curve fitting was performed according to Figure 2c as described in Materials and Methods but for each experiment individually (n≥26 spheroids were monitored per radiation dose group in all HT treatment arms). TERs with 95% confidence interval (CI) were determined via the SCD<sub>50</sub> values derived from the SCP curves.

| Spheroid type |              |        | HT+RT             |                   |                   |                   |
|---------------|--------------|--------|-------------------|-------------------|-------------------|-------------------|
|               |              |        | 42.5 °C<br>30 min | 42.5 °C<br>60 min | 44.5 °C<br>30 min | 46.5 °C<br>30 min |
| FaDu          | Experiment 1 | TER    | 1.2               | 1.6               | 1.5               | 3.5               |
|               |              | 95% CI | 1.2-1.3           | 1.5-1.7           | 1.4-1.7           | 3.0-4.1           |
|               | Experiment 2 | TER    | 1.2               | 1.5               | 1.4               | 2.9               |
|               |              | 95% CI | 1.2-1.3           | 1.4-1.6           | 1.3-1.5           | 2.7-3.1           |
| SAS           | Experiment 1 | TER    | 1.3               | 1.7               | 1.9               | 4.5               |
|               |              | 95% CI | 1.2-1.4           | 1.6-1.7           | 1.8-2.0           | 4.0-5.0           |
|               | Experiment 2 | TER    | 1.3               | 1.6               | 2.1               | 4.7               |
|               |              | 95% CI | 1.3-1.4           | 1.5-1.7           | 2.0-2.2           | 4.3-5.1           |
