# Supplementary material for: Efficient Heat Shock Response Affects Hyperthermia-Induced Radiosensitization in a Tumor Spheroid Control Probability Assay
Source: Cancers (Basel). 2021 Jun 25;13(13):3168. doi: 10.3390/cancers13133168 (PMC8269038; doi:10.3390/cancers13133168)
Supplement: Supplementary file 1 [file cancers-13-03168-s001.zip]

Archive with 4 entries (4 files):
- Figures S1-S4.pdf
- Table S5.xlsx
- Table S6.xlsx
- Tables S1-S4.pdf
