# Supplementary material for: Efficient Heat Shock Response Affects Hyperthermia-Induced Radiosensitization in a Tumor Spheroid Control Probability Assay
Source: Cancers (Basel). 2021 Jun 25;13(13):3168. doi: 10.3390/cancers13133168 (PMC8269038; doi:10.3390/cancers13133168)
Supplement: Supplementary file 1 [file cancers-13-03168-s001.zip › Table S5.xlsx]

## Sheet: FaDu spheroids
RT_Total	HT_Total	HT+RT_Total	RT_Unique	HT_Unique	HT+RT Unique	HT and HT+RT_Common	RT and HT and HT+RT_Common		Legend
AC010168.2	AC002128.1	AATBC	AC010168.2	AC004854.2	AATBC	AC002128.1	AC027290.2		List of sig. regulated genes in total under RT
AC027290.2	AC002128.2	AATK	GPR3	AC005261.5	AATK	AC002128.2	ATF3		List of sig. regulated genes in total under HT
ATF3	AC002310.6	AC002128.1		AC005785.1	AC004623.1	AC002310.6	CSRNP1		List of sig. regulated genes in total under HT+RT
CSRNP1	AC003681.1	AC002128.2		AC008735.4	AC004918.3	AC003681.1	CTGF		List of sig. unique regulated genes under RT
CTGF	AC004520.1	AC002310.6		AC009065.8	AC004975.2	AC004520.1	CXCL2		List of sig. unique regulated genes under HT
CXCL2	AC004854.2	AC003681.1		AC009113.1	AC005899.8	AC004884.2	CYR61		List of sig. unique regulated genes under HT+RT
CYR61	AC004884.2	AC004520.1		AC009121.1	AC007364.1	AC005041.3	FOSB		List of sig. common regulated genes under HT and HT+RT
FOSB	AC005041.3	AC004623.1		AC009283.1	AC007390.2	AC005480.1	LINC00641		List of sig. common regulated genes under RT, HT & HT+RT
GPR3	AC005261.5	AC004884.2		AC012615.4	AC007622.2	AC005481.1	NFKBIZ
LINC00641	AC005480.1	AC004918.3		AC020911.1	AC007686.1	AC005632.2	RHOB
NFKBIZ	AC005481.1	AC004975.2		AC021739.2	AC007728.2	AC005674.2
RHOB	AC005632.2	AC005041.3		AC027176.2	AC009041.4	AC005839.1
	AC005674.2	AC005480.1		AC074117.1	AC009108.3	AC005841.1
	AC005785.1	AC005481.1		AC087388.1	AC010132.3	AC006128.1
	AC005839.1	AC005632.2		AC093323.1	AC010226.1	AC007163.1
	AC005841.1	AC005674.2		AC104695.2	AC010595.1	AC007191.1
	AC006128.1	AC005839.1		AC105339.2	AC011511.2	AC008115.3
	AC007163.1	AC005841.1		AC124319.1	AC011676.1	AC008147.2
	AC007191.1	AC005899.8		AC140479.2	AC011912.1	AC008556.1
	AC008115.3	AC006128.1		AC144548.1	AC013476.1	AC008687.4
	AC008147.2	AC007163.1		AC245052.4	AC016586.1	AC008741.2
	AC008556.1	AC007191.1		ACAP1	AC018695.4	AC008760.1
	AC008687.4	AC007364.1		ADGRB1	AC020661.1	AC008764.6
	AC008735.4	AC007390.2		ADPRHL2	AC021739.1	AC008894.3
	AC008741.2	AC007622.2		AL022322.1	AC022154.1	AC008982.2
	AC008760.1	AC007686.1		AL031055.1	AC022400.7	AC009078.3
	AC008764.6	AC007728.2		AL031595.3	AC022400.8	AC010271.1
	AC008894.3	AC008115.3		AL035563.1	AC022558.3	AC010531.3
	AC008982.2	AC008147.2		AL137186.2	AC026124.2	AC010973.2
	AC009065.8	AC008556.1		AL139385.1	AC046176.1	AC010976.1
	AC009078.3	AC008687.4		AL445490.1	AC073130.2	AC010980.1
	AC009113.1	AC008741.2		AL449212.1	AC073333.1	AC011498.7
	AC009121.1	AC008760.1		AL662844.4	AC073487.1	AC012181.1
	AC009283.1	AC008764.6		ANGPTL4	AC084018.2	AC012181.2
	AC010271.1	AC008894.3		AP002364.1	AC084125.2	AC012435.1
	AC010531.3	AC008982.2		AP005233.2	AC090181.2	AC012485.1
	AC010973.2	AC009041.4		BEND3P1	AC092384.3	AC013394.1
	AC010976.1	AC009078.3		C2	AC093297.2	AC016876.2
	AC010980.1	AC009108.3		CACNG8	AC093591.3	AC018529.2
	AC011498.7	AC010132.3		CCDC120	AC093673.1	AC020915.1
	AC012181.1	AC010226.1		CDHR5	AC104534.1	AC023157.3
	AC012181.2	AC010271.1		CDKN1C	AC106820.4	AC025034.1
	AC012435.1	AC010531.3		CYTH2	AC108010.1	AC025183.1
	AC012485.1	AC010595.1		DCP1B	AC109449.1	AC025259.3
	AC012615.4	AC010973.2		DMC1	AC124319.2	AC026803.2
	AC013394.1	AC010976.1		DNAAF1	AC131971.1	AC027373.1
	AC016876.2	AC010980.1		ERICD	AC132938.5	AC027601.1
	AC018529.2	AC011498.7		FAM78A	AC137932.3	AC032044.1
	AC020911.1	AC011511.2		FBXO5	AC139749.1	AC037198.1
	AC020915.1	AC011676.1		FOXD1	AC148477.2	AC037198.2
	AC021739.2	AC011912.1		GATA5	AC148477.4	AC039056.2
	AC023157.3	AC012181.1		GJC2	AC242376.2	AC063976.2
	AC025034.1	AC012181.2		GTF2IP23	ADIRF-AS1	AC068205.2
	AC025183.1	AC012435.1		HLA-F-AS1	ADM2	AC072061.1
	AC025259.3	AC012485.1		HNRNPCP1	AL008726.1	AC073957.3
	AC026803.2	AC013394.1		HOXC9	AL022238.3	AC074050.4
	AC027176.2	AC013476.1		HTR7P1	AL033397.2	AC080112.3
	AC027290.2	AC016586.1		IDI2-AS1	AL035252.3	AC084018.1
	AC027373.1	AC016876.2		IQCN	AL049776.1	AC084880.1
	AC027601.1	AC018529.2		IRX3	AL132838.1	AC087289.5
	AC032044.1	AC018695.4		ISL2	AL133243.3	AC087741.3
	AC037198.1	AC020661.1		KLB	AL139089.1	AC090617.5
	AC037198.2	AC020915.1		KLF2P1	AL139317.4	AC090739.1
	AC039056.2	AC021739.1		LBX2	AL157871.2	AC090970.3
	AC063976.2	AC022154.1		LGI4	AL162742.1	AC092117.2
	AC068205.2	AC022400.7		LGR4	AL353796.1	AC092119.2
	AC072061.1	AC022400.8		LINC00115	AL353807.3	AC092803.2
	AC073957.3	AC022558.3		LINC00324	AL354836.1	AC093525.8
	AC074050.4	AC023157.3		LINC01004	AL355488.1	AC097381.1
	AC074117.1	AC025034.1		LINC01615	AL442125.1	AC097382.2
	AC080112.3	AC025183.1		LINC01715	AL592301.1	AC100786.1
	AC084018.1	AC025259.3		LINC02365	AL645940.1	AC105001.1
	AC084880.1	AC026124.2		LY6G5B	AL663070.1	AC105339.3
	AC087289.5	AC026803.2		LY6G6C	ALPI	AC106037.2
	AC087388.1	AC027290.2		MAP10	AP000911.1	AC106782.6
	AC087741.3	AC027373.1		MAP4K1	AP001271.2	AC106886.4
	AC090617.5	AC027601.1		MAPK8IP1P2	AP002490.1	AC107081.2
	AC090739.1	AC032044.1		MID1IP1-AS1	B3GNT8	AC107959.1
	AC090970.3	AC037198.1		MIR17HG	BDKRB1	AC108134.1
	AC092117.2	AC037198.2		MIR22HG	BDKRB2	AC108134.2
	AC092119.2	AC039056.2		MKNK1-AS1	BHLHE40-AS1	AC109326.1
	AC092803.2	AC046176.1		MLC1	BX470102.1	AC113410.3
	AC093323.1	AC063976.2		MRNIP	BX539320.1	AC114947.2
	AC093525.8	AC068205.2		NAGS	C1QTNF1	AC116407.2
	AC097381.1	AC072061.1		OVGP1	C8G	AC117503.3
	AC097382.2	AC073130.2		PARS2	CACYBP	AC120057.3
	AC100786.1	AC073333.1		PCBP1-AS1	CAND2	AC122688.3
	AC104695.2	AC073487.1		PNPLA7	CAPN12	AC124068.2
	AC105001.1	AC073957.3		POU2F2	CCDC17	AC124283.2
	AC105339.2	AC074050.4		PPRC1	CD7	AC126696.2
	AC105339.3	AC080112.3		PTGER2	CDC42EP3	AC130371.2
	AC106037.2	AC084018.1		RBKS	CGB7	AC131212.3
	AC106782.6	AC084018.2		RHOQP1	CILP2	AC132192.2
	AC106886.4	AC084125.2		RUFY4	CITED2	AC132872.3
	AC107081.2	AC084880.1		SCUBE3	CRACR2B	AC132872.4
	AC107959.1	AC087289.5		SNORA22B	CYP2D8P	AC138150.2
	AC108134.1	AC087741.3		SOX17	DACT3-AS1	AC139149.1
	AC108134.2	AC090181.2		SPACA6	DCLRE1B	AC139887.2
	AC109326.1	AC090617.5		SPRED3	DDIT4L	AC141928.1
	AC113410.3	AC090739.1		SPSB1	DDX47	AC144831.1
	AC114947.2	AC090970.3		SULT1A3	F2RL1	AC145207.8
	AC116407.2	AC092117.2		TIGD6	FAM110B	AC147651.1
	AC117503.3	AC092119.2		TMEM198B	FDXACB1	AC148477.3
	AC120057.3	AC092384.3		TNFRSF13C	FERMT3	AC243772.2
	AC122688.3	AC092803.2		TNS4	FEZF1-AS1	ACHE
	AC124068.2	AC093297.2		TP53	FICD	ACTBL2
	AC124283.2	AC093525.8		TPM1-AS	FOXI3	ACTL10
	AC124319.1	AC093591.3		TRIM69	FOXO3B	ADAMTS1
	AC126696.2	AC093673.1		TSKU	FP565260.3	ADM5
	AC130371.2	AC097381.1		TSSK5P	FZD10-AS1	ADRA2B
	AC131212.3	AC097382.2		TTLL13P	GADD45A	AKR7A2P1
	AC132192.2	AC100786.1		U62317.3	GALR2	AL008733.1
	AC132872.3	AC104534.1		VGF	GCNT7	AL021578.1
	AC132872.4	AC105001.1		VPS18	GNG13	AL021878.2
	AC138150.2	AC105339.3		YEATS2-AS1	GRIN2C	AL022322.2
	AC139149.1	AC106037.2		ZC3H10	GTF3C2-AS1	AL022323.4
	AC139887.2	AC106782.6		ZFP37	HAS2	AL022328.3
	AC140479.2	AC106820.4		ZNF2	HIST2H2BE	AL031710.2
	AC141928.1	AC106886.4		ZNF230	HLA-U	AL031714.1
	AC144548.1	AC107081.2		ZNF607	HNRNPA3P9	AL049780.1
	AC144831.1	AC107959.1			HOXC-AS3	AL078621.1
	AC145207.8	AC108010.1			HSPB6	AL109614.1
	AC147651.1	AC108134.1			IGIP	AL109955.1
	AC148477.3	AC108134.2			IGSF6	AL118506.1
	AC243772.2	AC109326.1			IL12RB2	AL121987.2
	AC245052.4	AC109449.1			INHBB	AL133230.1
	ACAP1	AC113410.3			IQCC	AL137003.2
	ACHE	AC114947.2			KLF6	AL137077.2
	ACTBL2	AC116407.2			KLF9	AL137782.1
	ACTL10	AC117503.3			KRT18P7	AL139289.1
	ADAMTS1	AC120057.3			LHB	AL158825.2
	ADGRB1	AC122688.3			LINC00472	AL353625.1
	ADM5	AC124068.2			LINC01572	AL354726.1
	ADPRHL2	AC124283.2			LINC01679	AL354733.3
	ADRA2B	AC124319.2			LINC02361	AL355987.4
	AKR7A2P1	AC126696.2			LSMEM2	AL357033.3
	AL008733.1	AC130371.2			MALAT1	AL357033.4
	AL021578.1	AC131212.3			MAPK15	AL357060.1
	AL021878.2	AC131971.1			MIR1276	AL359922.2
	AL022322.1	AC132192.2			MIR616	AL360270.3
	AL022322.2	AC132872.3			MIR6775	AL365203.2
	AL022323.4	AC132872.4			MIR7111	AL390719.1
	AL022328.3	AC132938.5			MN1	AL390719.2
	AL031055.1	AC137932.3			MROH8	AL391650.1
	AL031595.3	AC138150.2			MSLNL	AL391684.1
	AL031710.2	AC139149.1			MSX1	AL445931.1
	AL031714.1	AC139749.1			MSX2	AL512770.1
	AL035563.1	AC139887.2			MT-TM	AL512791.1
	AL049780.1	AC141928.1			MT-TT	AL590369.1
	AL078621.1	AC144831.1			MT-TY	AL603756.1
	AL109614.1	AC145207.8			MUC2	AL604028.2
	AL109955.1	AC147651.1			MUC5AC	AL645608.8
	AL118506.1	AC148477.2			NHLH1	AL645608.9
	AL121987.2	AC148477.3			NPTN-IT1	AL662890.1
	AL133230.1	AC148477.4			NPY1R	AL691482.3
	AL137003.2	AC242376.2			NUAK2	AL807752.5
	AL137077.2	AC243772.2			OXSM	ALKBH4
	AL137186.2	ACHE			PCAT1	ALOX12P2
	AL137782.1	ACTBL2			PCDH19	ALOXE3
	AL139289.1	ACTL10			PLA2G12AP1	ALPPL2
	AL139385.1	ADAMTS1			PLAUR	AMD1
	AL158825.2	ADIRF-AS1			PLCH2	ANKRD34A
	AL353625.1	ADM2			PNMA8A	ANKRD37
	AL354726.1	ADM5			PRDX3P1	AOC2
	AL354733.3	ADRA2B			PTGER3	AOC3
	AL355987.4	AKR7A2P1			RAB19	AP000254.1
	AL357033.3	AL008726.1			RF00019	AP000648.3
	AL357033.4	AL008733.1			RHOU	AP001107.5
	AL357060.1	AL021578.1			RNF224	AP001157.1
	AL359922.2	AL021878.2			RNF225	AP001610.1
	AL360270.3	AL022238.3			RNF39	AP002336.1
	AL365203.2	AL022322.2			S100A1	AP002336.2
	AL390719.1	AL022323.4			SBSN	AP002336.3
	AL390719.2	AL022328.3			SCNN1D	AP002907.1
	AL391650.1	AL031710.2			SEMA7A	AP002990.1
	AL391684.1	AL031714.1			SGK1	AP003352.1
	AL445490.1	AL033397.2			SH3GL1P1	AP003469.4
	AL445931.1	AL035252.3			SLC16A11	AP005329.2
	AL449212.1	AL049776.1			SMG1P1	AP006621.1
	AL512770.1	AL049780.1			SNORA71B	AP006621.5
	AL512791.1	AL078621.1			SNORA75	AP006623.1
	AL590369.1	AL109614.1			SNORD11	AP4B1-AS1
	AL603756.1	AL109955.1			SNORD20	ARC
	AL604028.2	AL118506.1			SNORD63B	ARHGAP30
	AL645608.8	AL121987.2			SOWAHA	ARL14
	AL645608.9	AL132838.1			SPDYA	ARL4A
	AL662844.4	AL133230.1			SPRY2	ATAD3C
	AL662890.1	AL133243.3			SRRM3	ATP1B3-AS1
	AL691482.3	AL137003.2			TAS1R3	ATP2B1-AS1
	AL807752.5	AL137077.2			TEX19	AVPI1
	ALKBH4	AL137782.1			TMEM120B	AZIN1-AS1
	ALOX12P2	AL139089.1			TMEM187	BAG3
	ALOXE3	AL139289.1			TMPRSS9	BAMBI
	ALPPL2	AL139317.4			TNF	BCDIN3D
	AMD1	AL157871.2			TNFAIP3	BCYRN1
	ANGPTL4	AL158825.2			UCKL1-AS1	BMP4
	ANKRD34A	AL162742.1			UCP3	BRI3BP
	ANKRD37	AL353625.1			VASN	BTBD19
	AOC2	AL353796.1			VDAC1P8	BTG2
	AOC3	AL353807.3			WDR86	BTG3-AS1
	AP000254.1	AL354726.1			WHRN	BTN2A3P
	AP000648.3	AL354733.3			WT1-AS	BX255925.1
	AP001107.5	AL354836.1			ZBTB20	C11orf95
	AP001157.1	AL355488.1			ZNF114	C11orf96
	AP001610.1	AL355987.4			ZNF281	C17orf67
	AP002336.1	AL357033.3			ZNF627	C17orf97
	AP002336.2	AL357033.4			ZSCAN12	C1orf226
	AP002336.3	AL357060.1				C1orf61
	AP002364.1	AL359922.2				C5orf66
	AP002907.1	AL360270.3				C7orf25
	AP002990.1	AL365203.2				CACNA1G
	AP003352.1	AL390719.1				CACTIN-AS1
	AP003469.4	AL390719.2				CALM2P2
	AP005233.2	AL391650.1				CBFA2T3
	AP005329.2	AL391684.1				CBX3P4
	AP006621.1	AL442125.1				CBX4
	AP006621.5	AL445931.1				CCDC106
	AP006623.1	AL512770.1				CCDC121
	AP4B1-AS1	AL512791.1				CCDC150P1
	ARC	AL590369.1				CCDC39
	ARHGAP30	AL592301.1				CCDC71
	ARL14	AL603756.1				CCDC71L
	ARL4A	AL604028.2				CCDC96
	ATAD3C	AL645608.8				CCL20
	ATF3	AL645608.9				CCL26
	ATP1B3-AS1	AL645940.1				CCNL1
	ATP2B1-AS1	AL662890.1				CCNO
	AVPI1	AL663070.1				CCR7
	AZIN1-AS1	AL691482.3				CD83
	BAG3	AL807752.5				CDC25A
	BAMBI	ALKBH4				CDC42EP2
	BCDIN3D	ALOX12P2				CFL1P5
	BCYRN1	ALOXE3				CFP
	BEND3P1	ALPI				CHAC1
	BMP4	ALPPL2				CHRNA3
	BRI3BP	AMD1				CHRNA4
	BTBD19	ANKRD34A				CLDN15
	BTG2	ANKRD37				CLDN4
	BTG3-AS1	AOC2				CLDN6
	BTN2A3P	AOC3				CLDN9
	BX255925.1	AP000254.1				CLK1
	C11orf95	AP000648.3				COL2A1
	C11orf96	AP000911.1				CPEB2
	C17orf67	AP001107.5				CREB5
	C17orf97	AP001157.1				CRLF1
	C1orf226	AP001271.2				CRY2
	C1orf61	AP001610.1				CRYAB
	C2	AP002336.1				CRYBG2
	C5orf66	AP002336.2				CRYM-AS1
	C7orf25	AP002336.3				CSTF1
	CACNA1G	AP002490.1				CTBP1-AS
	CACNG8	AP002907.1				CXCL3
	CACTIN-AS1	AP002990.1				CXCL8
	CALM2P2	AP003352.1				CXCR4
	CBFA2T3	AP003469.4				CYP2D6
	CBX3P4	AP005329.2				DCAF4L1
	CBX4	AP006621.1				DCUN1D3
	CCDC106	AP006621.5				DDX20
	CCDC120	AP006623.1				DDX28
	CCDC121	AP4B1-AS1				DEDD2
	CCDC150P1	ARC				DEPP1
	CCDC39	ARHGAP30				DERL3
	CCDC71	ARL14				DGKE
	CCDC71L	ARL4A				DHDH
	CCDC96	ATAD3C				DLL4
	CCL20	ATF3				DLX2
	CCL26	ATP1B3-AS1				DLX5
	CCNL1	ATP2B1-AS1				DM1-AS
	CCNO	AVPI1				DNAJA1
	CCR7	AZIN1-AS1				DNAJA4
	CD83	B3GNT8				DNAJB1
	CDC25A	BAG3				DNAJB4
	CDC42EP2	BAMBI				DUSP1
	CDHR5	BCDIN3D				DUSP2
	CDKN1C	BCYRN1				DUSP5
	CFL1P5	BDKRB1				DUSP8
	CFP	BDKRB2				DUSP8P5
	CHAC1	BHLHE40-AS1				DUX4L26
	CHRNA3	BMP4				DXO
	CHRNA4	BRI3BP				EDN1
	CLDN15	BTBD19				EDN2
	CLDN4	BTG2				EFCAB12
	CLDN6	BTG3-AS1				EFNA4
	CLDN9	BTN2A3P				EGR1
	CLK1	BX255925.1				EGR2
	COL2A1	BX470102.1				EGR3
	CPEB2	BX539320.1				EGR4
	CREB5	C11orf95				EID3
	CRLF1	C11orf96				EIF1AD
	CRY2	C17orf67				EIF4A1
	CRYAB	C17orf97				EMX1
	CRYBG2	C1orf226				EN2
	CRYM-AS1	C1orf61				ENGASE
	CSRNP1	C1QTNF1				EPPK1
	CSTF1	C5orf66				ERRFI1
	CTBP1-AS	C7orf25				ESRRG
	CTGF	C8G				ETAA1
	CXCL2	CACNA1G				FADD
	CXCL3	CACTIN-AS1				FAM181A
	CXCL8	CACYBP				FAM20A
	CXCR4	CALM2P2				FAM43A
	CYP2D6	CAND2				FAM46A
	CYR61	CAPN12				FAM46B
	CYTH2	CBFA2T3				FAM46C
	DCAF4L1	CBX3P4				FAM83A-AS1
	DCP1B	CBX4				FAR2P1
	DCUN1D3	CCDC106				FBXL14
	DDX20	CCDC121				FBXW4P1
	DDX28	CCDC150P1				FGF19
	DEDD2	CCDC17				FILIP1L
	DEPP1	CCDC39				FKBP4
	DERL3	CCDC71				FLNB-AS1
	DGKE	CCDC71L				FNDC11
	DHDH	CCDC96				FOS
	DLL4	CCL20				FOSL1
	DLX2	CCL26				FOXC2
	DLX5	CCNL1				FOXD2
	DM1-AS	CCNO				FOXD2-AS1
	DMC1	CCR7				FOXD3
	DNAAF1	CD7				FOXF1
	DNAJA1	CD83				FTCD
	DNAJA4	CDC25A				FZD8
	DNAJB1	CDC42EP2				GABPB1-AS1
	DNAJB4	CDC42EP3				GADD45B
	DUSP1	CFL1P5				GADD45G
	DUSP2	CFP				GALNT9
	DUSP5	CGB7				GAS1
	DUSP8	CHAC1				GAS6-AS2
	DUSP8P5	CHRNA3				GBX2
	DUX4L26	CHRNA4				GEM
	DXO	CILP2				GEMIN4
	EDN1	CITED2				GGN
	EDN2	CLDN15				GPR50
	EFCAB12	CLDN4				GPR50-AS1
	EFNA4	CLDN6				GPRC5A
	EGR1	CLDN9				GRM2
	EGR2	CLK1				HBEGF
	EGR3	COL2A1				HCG4P5
	EGR4	CPEB2				HES1
	EID3	CRACR2B				HIC1
	EIF1AD	CREB5				HIST3H2A
	EIF4A1	CRLF1				HLA-V
	EMX1	CRY2				HOXA5
	EN2	CRYAB				HOXC13
	ENGASE	CRYBG2				HOXD1
	EPPK1	CRYM-AS1				HPDL
	ERICD	CSRNP1				HPS6
	ERRFI1	CSTF1				HSP90B2P
	ESRRG	CTBP1-AS				HSPA1A
	ETAA1	CTGF				HSPA1B
	FADD	CXCL2				HSPA1L
	FAM181A	CXCL3				HSPA6
	FAM20A	CXCL8				HSPA7
	FAM43A	CXCR4				HSPB1
	FAM46A	CYP2D6				HSPB8
	FAM46B	CYP2D8P				HSPH1
	FAM46C	CYR61				HYPK
	FAM78A	DACT3-AS1				ICOSLG
	FAM83A-AS1	DCAF4L1				ID1
	FAR2P1	DCLRE1B				ID2
	FBXL14	DCUN1D3				IER2
	FBXO5	DDIT4L				IER3
	FBXW4P1	DDX20				IER5
	FGF19	DDX28				IFNL1
	FILIP1L	DDX47				IL11
	FKBP4	DEDD2				IL16
	FLNB-AS1	DEPP1				IL1RL1
	FNDC11	DERL3				IL32
	FOS	DGKE				IL3RA
	FOSB	DHDH				IL6
	FOSL1	DLL4				INSIG1
	FOXC2	DLX2				INTS5
	FOXD1	DLX5				IRF8
	FOXD2	DM1-AS				IRS2
	FOXD2-AS1	DNAJA1				IRX4
	FOXD3	DNAJA4				IRX5
	FOXF1	DNAJB1				JHDM1D-AS1
	FTCD	DNAJB4				JMJD6
	FZD8	DUSP1				JUN
	GABPB1-AS1	DUSP2				JUNB
	GADD45B	DUSP5				JUND
	GADD45G	DUSP8				KAZALD1
	GALNT9	DUSP8P5				KC877982.1
	GAS1	DUX4L26				KCNC3
	GAS6-AS2	DXO				KCND1
	GATA5	EDN1				KCNF1
	GBX2	EDN2				KCNG3
	GEM	EFCAB12				KCNQ1OT1
	GEMIN4	EFNA4				KCTD11
	GGN	EGR1				KDM4A-AS1
	GJC2	EGR2				KLF2
	GPR50	EGR3				KLF3-AS1
	GPR50-AS1	EGR4				KLHL15
	GPRC5A	EID3				KLHL25
	GRM2	EIF1AD				KLHL26
	GTF2IP23	EIF4A1				KLHL31
	HBEGF	EMX1				KRT17P1
	HCG4P5	EN2				KRT8P12
	HES1	ENGASE				KRT8P33
	HIC1	EPPK1				LAG3
	HIST3H2A	ERRFI1				LEMD3
	HLA-F-AS1	ESRRG				LFNG
	HLA-V	ETAA1				LINC00304
	HNRNPCP1	F2RL1				LINC00346
	HOXA5	FADD				LSMEM1
	HOXC13	FAM110B				LURAP1L
	HOXC9	FAM181A				LY6K
	HOXD1	FAM20A				MAFA
	HPDL	FAM43A				MAFB
	HPS6	FAM46A				MAFF
	HSP90B2P	FAM46B				MAFK
	HSPA1A	FAM46C				MAL2-AS1
	HSPA1B	FAM83A-AS1				MAMDC4
	HSPA1L	FAR2P1				MAP1A
	HSPA6	FBXL14				MAP3K8
	HSPA7	FBXW4P1				MCL1
	HSPB1	FDXACB1				MED18
	HSPB8	FERMT3				MEX3B
	HSPH1	FEZF1-AS1				MIEF2
	HTR7P1	FGF19				MIR3153
	HYPK	FICD				MIR429
	ICOSLG	FILIP1L				MIR5188
	ID1	FKBP4				MIR6821
	ID2	FLNB-AS1				MIRLET7BHG
	IDI2-AS1	FNDC11				MNX1-AS2
	IER2	FOS				MPIG6B
	IER3	FOSB				MRM1
	IER5	FOSL1				MRPL18
	IFNL1	FOXC2				MT-TF
	IL11	FOXD2				MT-TI
	IL16	FOXD2-AS1				MT-TL1
	IL1RL1	FOXD3				MT-TQ
	IL32	FOXF1				MXRA8
	IL3RA	FOXI3				MYADM
	IL6	FOXO3B				MYCL
	INSIG1	FP565260.3				MYO15B
	INTS5	FTCD				NAALAD2
	IQCN	FZD10-AS1				NAP1L4P1
	IRF8	FZD8				NHLRC1
	IRS2	GABPB1-AS1				NKILA
	IRX3	GADD45A				NKRF
	IRX4	GADD45B				NKX2-2
	IRX5	GADD45G				NKX3-1
	ISL2	GALNT9				NNAT
	JHDM1D-AS1	GALR2				NOCT
	JMJD6	GAS1				NOS1AP
	JUN	GAS6-AS2				NR4A1
	JUNB	GBX2				NR4A2
	JUND	GCNT7				NR4A3
	KAZALD1	GEM				NRARP
	KC877982.1	GEMIN4				OLMALINC
	KCNC3	GGN				OSR2
	KCND1	GNG13				OTUD1
	KCNF1	GPR50				OVOL1
	KCNG3	GPR50-AS1				OVOL1-AS1
	KCNQ1OT1	GPRC5A				P2RX2
	KCTD11	GRIN2C				PABPC4L
	KDM4A-AS1	GRM2				PARD6B
	KLB	GTF3C2-AS1				PCDH12
	KLF2	HAS2				PCDH9
	KLF2P1	HBEGF				PCF11
	KLF3-AS1	HCG4P5				PCK1
	KLHL15	HES1				PGF
	KLHL25	HIC1				PHLDA2
	KLHL26	HIST2H2BE				PIK3IP1
	KLHL31	HIST3H2A				PLCG1-AS1
	KRT17P1	HLA-U				PLK3
	KRT8P12	HLA-V				PLPPR3
	KRT8P33	HNRNPA3P9				PMAIP1
	LAG3	HOXA5				PNLDC1
	LBX2	HOXC13				POLR2J4
	LEMD3	HOXC-AS3				POU3F1
	LFNG	HOXD1				PPP1R10
	LGI4	HPDL				PPP1R15A
	LGR4	HPS6				PPP1R3C
	LINC00115	HSP90B2P				PPP1R3G
	LINC00304	HSPA1A				PRKCZ-AS1
	LINC00324	HSPA1B				PROCA1
	LINC00346	HSPA1L				PROX2
	LINC00641	HSPA6				PRPS1P2
	LINC01004	HSPA7				PRSS22
	LINC01615	HSPB1				PTGER4
	LINC01715	HSPB6				PTGS2
	LINC02365	HSPB8				PTX3
	LSMEM1	HSPH1				RASAL2-AS1
	LURAP1L	HYPK				RASD1
	LY6G5B	ICOSLG				RASL11A
	LY6G6C	ID1				RBFOX3
	LY6K	ID2				RBM12B-AS1
	MAFA	IER2				RBM14-RBM4
	MAFB	IER3				RDH10-AS1
	MAFF	IER5				RF00404
	MAFK	IFNL1				RF01241
	MAL2-AS1	IGIP				RF02271
	MAMDC4	IGSF6				RFTN2
	MAP10	IL11				RGS16
	MAP1A	IL12RB2				RGS2
	MAP3K8	IL16				RIPK4
	MAP4K1	IL1RL1				RN7SL809P
	MAPK8IP1P2	IL32				RND1
	MCL1	IL3RA				RNF103-CHMP3
	MED18	IL6				RNF223
	MEX3B	INHBB				RNU6-2
	MID1IP1-AS1	INSIG1				RNU6-9
	MIEF2	INTS5				RP13-766D20.1
	MIR17HG	IQCC				RPUSD2
	MIR22HG	IRF8				RRAD
	MIR3153	IRS2				RSRP1
	MIR429	IRX4				RTL5
	MIR5188	IRX5				RUSC1-AS1
	MIR6821	JHDM1D-AS1				S1PR1
	MIRLET7BHG	JMJD6				S1PR5
	MKNK1-AS1	JUN				SAMD11
	MLC1	JUNB				SARM1
	MNX1-AS2	JUND				SAT1
	MPIG6B	KAZALD1				SCUBE1
	MRM1	KC877982.1				SEMA3F-AS1
	MRNIP	KCNC3				SERPINH1
	MRPL18	KCND1				SERTAD1
	MT-TF	KCNF1				SERTAD3
	MT-TI	KCNG3				SHISA2
	MT-TL1	KCNQ1OT1				SIK1B
	MT-TQ	KCTD11				SLC11A1
	MXRA8	KDM4A-AS1				SLC22A17
	MYADM	KLF2				SLC23A1
	MYCL	KLF3-AS1				SLC25A21-AS1
	MYO15B	KLF6				SLC34A3
	NAALAD2	KLF9				SLC9A3
	NAGS	KLHL15				SLC9A3-AS1
	NAP1L4P1	KLHL25				SLCO4A1-AS1
	NFKBIZ	KLHL26				SLX1A-SULT1A3
	NHLRC1	KLHL31				SMAD7
	NKILA	KRT17P1				SMIM10L2A
	NKRF	KRT18P7				SNAI1
	NKX2-2	KRT8P12				SNHG15
	NKX3-1	KRT8P33				SNHG19
	NNAT	LAG3				SNHG26
	NOCT	LEMD3				SNORA20
	NOS1AP	LFNG				SNORA23
	NR4A1	LHB				SNORA28
	NR4A2	LINC00304				SNORA2C
	NR4A3	LINC00346				SNORA31
	NRARP	LINC00472				SNORD104
	OLMALINC	LINC00641				SNORD12C
	OSR2	LINC01572				SNORD14E
	OTUD1	LINC01679				SNX32
	OVGP1	LINC02361				SOCS1
	OVOL1	LSMEM1				SOCS3
	OVOL1-AS1	LSMEM2				SOWAHB
	P2RX2	LURAP1L				SOWAHC
	PABPC4L	LY6K				SOX7
	PARD6B	MAFA				SOX9
	PARS2	MAFB				SPHK1
	PCBP1-AS1	MAFF				SPON1
	PCDH12	MAFK				SPRY4
	PCDH9	MAL2-AS1				SRMS
	PCF11	MALAT1				STX11
	PCK1	MAMDC4				TADA1
	PGF	MAP1A				TAF7
	PHLDA2	MAP3K8				TBX2
	PIK3IP1	MAPK15				TBX3
	PLCG1-AS1	MCL1				TCEAL9
	PLK3	MED18				TDRG1
	PLPPR3	MEX3B				THBS1
	PMAIP1	MIEF2				TIAF1
	PNLDC1	MIR1276				TIGD1
	PNPLA7	MIR3153				TIGD3
	POLR2J4	MIR429				TIMM23B
	POU2F2	MIR5188				TMC8
	POU3F1	MIR616				TMEM255B
	PPP1R10	MIR6775				TNFRSF18
	PPP1R15A	MIR6821				TNNT2
	PPP1R3C	MIR7111				TPM3P9
	PPP1R3G	MIRLET7BHG				TRIB1
	PPRC1	MN1				TRIM15
	PRKCZ-AS1	MNX1-AS2				TRIM46
	PROCA1	MPIG6B				TSPEAR-AS1
	PROX2	MRM1				TSPOAP1-AS1
	PRPS1P2	MROH8				TSPY26P
	PRSS22	MRPL18				TSPYL2
	PTGER2	MSLNL				TSPYL4
	PTGER4	MSX1				TTLL10
	PTGS2	MSX2				TUBB3
	PTX3	MT-TF				TULP2
	RASAL2-AS1	MT-TI				U2AF1
	RASD1	MT-TL1				U2AF1L5
	RASL11A	MT-TM				UBB
	RBFOX3	MT-TQ				UBC
	RBKS	MT-TT				ULBP1
	RBM12B-AS1	MT-TY				USP17L2
	RBM14-RBM4	MUC2				USP17L7
	RDH10-AS1	MUC5AC				USPL1
	RF00404	MXRA8				VTRNA1-3
	RF01241	MYADM				WNT3
	RF02271	MYCL				WNT9A
	RFTN2	MYO15B				Z83844.2
	RGS16	NAALAD2				Z92544.2
	RGS2	NAP1L4P1				Z98884.2
	RHOB	NFKBIZ				ZC3H12A
	RHOQP1	NHLH1				ZC3H4
	RIPK4	NHLRC1				ZDHHC11
	RN7SL809P	NKILA				ZFAND2A
	RND1	NKRF				ZFP36
	RNF103-CHMP3	NKX2-2				ZFP36L1
	RNF223	NKX3-1				ZKSCAN4
	RNU6-2	NNAT				ZNF155
	RNU6-9	NOCT				ZNF212
	RP13-766D20.1	NOS1AP				ZNF222
	RPUSD2	NPTN-IT1				ZNF225
	RRAD	NPY1R				ZNF331
	RSRP1	NR4A1				ZNF460
	RTL5	NR4A2				ZNF572
	RUFY4	NR4A3				ZNF606
	RUSC1-AS1	NRARP				ZNF624
	S1PR1	NUAK2				ZNF658
	S1PR5	OLMALINC				ZNF703
	SAMD11	OSR2				ZNF767P
	SARM1	OTUD1
	SAT1	OVOL1
	SCUBE1	OVOL1-AS1
	SCUBE3	OXSM
	SEMA3F-AS1	P2RX2
	SERPINH1	PABPC4L
	SERTAD1	PARD6B
	SERTAD3	PCAT1
	SHISA2	PCDH12
	SIK1B	PCDH19
	SLC11A1	PCDH9
	SLC22A17	PCF11
	SLC23A1	PCK1
	SLC25A21-AS1	PGF
	SLC34A3	PHLDA2
	SLC9A3	PIK3IP1
	SLC9A3-AS1	PLA2G12AP1
	SLCO4A1-AS1	PLAUR
	SLX1A-SULT1A3	PLCG1-AS1
	SMAD7	PLCH2
	SMIM10L2A	PLK3
	SNAI1	PLPPR3
	SNHG15	PMAIP1
	SNHG19	PNLDC1
	SNHG26	PNMA8A
	SNORA20	POLR2J4
	SNORA22B	POU3F1
	SNORA23	PPP1R10
	SNORA28	PPP1R15A
	SNORA2C	PPP1R3C
	SNORA31	PPP1R3G
	SNORD104	PRDX3P1
	SNORD12C	PRKCZ-AS1
	SNORD14E	PROCA1
	SNX32	PROX2
	SOCS1	PRPS1P2
	SOCS3	PRSS22
	SOWAHB	PTGER3
	SOWAHC	PTGER4
	SOX17	PTGS2
	SOX7	PTX3
	SOX9	RAB19
	SPACA6	RASAL2-AS1
	SPHK1	RASD1
	SPON1	RASL11A
	SPRED3	RBFOX3
	SPRY4	RBM12B-AS1
	SPSB1	RBM14-RBM4
	SRMS	RDH10-AS1
	STX11	RF00019
	SULT1A3	RF00404
	TADA1	RF01241
	TAF7	RF02271
	TBX2	RFTN2
	TBX3	RGS16
	TCEAL9	RGS2
	TDRG1	RHOB
	THBS1	RHOU
	TIAF1	RIPK4
	TIGD1	RN7SL809P
	TIGD3	RND1
	TIGD6	RNF103-CHMP3
	TIMM23B	RNF223
	TMC8	RNF224
	TMEM198B	RNF225
	TMEM255B	RNF39
	TNFRSF13C	RNU6-2
	TNFRSF18	RNU6-9
	TNNT2	RP13-766D20.1
	TNS4	RPUSD2
	TP53	RRAD
	TPM1-AS	RSRP1
	TPM3P9	RTL5
	TRIB1	RUSC1-AS1
	TRIM15	S100A1
	TRIM46	S1PR1
	TRIM69	S1PR5
	TSKU	SAMD11
	TSPEAR-AS1	SARM1
	TSPOAP1-AS1	SAT1
	TSPY26P	SBSN
	TSPYL2	SCNN1D
	TSPYL4	SCUBE1
	TSSK5P	SEMA3F-AS1
	TTLL10	SEMA7A
	TTLL13P	SERPINH1
	TUBB3	SERTAD1
	TULP2	SERTAD3
	U2AF1	SGK1
	U2AF1L5	SH3GL1P1
	U62317.3	SHISA2
	UBB	SIK1B
	UBC	SLC11A1
	ULBP1	SLC16A11
	USP17L2	SLC22A17
	USP17L7	SLC23A1
	USPL1	SLC25A21-AS1
	VGF	SLC34A3
	VPS18	SLC9A3
	VTRNA1-3	SLC9A3-AS1
	WNT3	SLCO4A1-AS1
	WNT9A	SLX1A-SULT1A3
	YEATS2-AS1	SMAD7
	Z83844.2	SMG1P1
	Z92544.2	SMIM10L2A
	Z98884.2	SNAI1
	ZC3H10	SNHG15
	ZC3H12A	SNHG19
	ZC3H4	SNHG26
	ZDHHC11	SNORA20
	ZFAND2A	SNORA23
	ZFP36	SNORA28
	ZFP36L1	SNORA2C
	ZFP37	SNORA31
	ZKSCAN4	SNORA71B
	ZNF155	SNORA75
	ZNF2	SNORD104
	ZNF212	SNORD11
	ZNF222	SNORD12C
	ZNF225	SNORD14E
	ZNF230	SNORD20
	ZNF331	SNORD63B
	ZNF460	SNX32
	ZNF572	SOCS1
	ZNF606	SOCS3
	ZNF607	SOWAHA
	ZNF624	SOWAHB
	ZNF658	SOWAHC
	ZNF703	SOX7
	ZNF767P	SOX9
		SPDYA
		SPHK1
		SPON1
		SPRY2
		SPRY4
		SRMS
		SRRM3
		STX11
		TADA1
		TAF7
		TAS1R3
		TBX2
		TBX3
		TCEAL9
		TDRG1
		TEX19
		THBS1
		TIAF1
		TIGD1
		TIGD3
		TIMM23B
		TMC8
		TMEM120B
		TMEM187
		TMEM255B
		TMPRSS9
		TNF
		TNFAIP3
		TNFRSF18
		TNNT2
		TPM3P9
		TRIB1
		TRIM15
		TRIM46
		TSPEAR-AS1
		TSPOAP1-AS1
		TSPY26P
		TSPYL2
		TSPYL4
		TTLL10
		TUBB3
		TULP2
		U2AF1
		U2AF1L5
		UBB
		UBC
		UCKL1-AS1
		UCP3
		ULBP1
		USP17L2
		USP17L7
		USPL1
		VASN
		VDAC1P8
		VTRNA1-3
		WDR86
		WHRN
		WNT3
		WNT9A
		WT1-AS
		Z83844.2
		Z92544.2
		Z98884.2
		ZBTB20
		ZC3H12A
		ZC3H4
		ZDHHC11
		ZFAND2A
		ZFP36
		ZFP36L1
		ZKSCAN4
		ZNF114
		ZNF155
		ZNF212
		ZNF222
		ZNF225
		ZNF281
		ZNF331
		ZNF460
		ZNF572
		ZNF606
		ZNF624
		ZNF627
		ZNF658
		ZNF703
		ZNF767P
		ZSCAN12

## Sheet: SAS spheroids
RT_Total	HT_Total	HT+RT_Total	RT_Unique	HT_Unique	HT+RT Unique	HT and HT+RT_Common	RT and HT and HT+RT_Common		Legend
AC112907.3	AADAC	AADAC	AC112907.3	ABCB6	AC004918.1	AADAC	CTGF		List of sig. regulated genes in total under RT
AC135178.3	ABCB6	ABHD3	AC135178.3	AC004980.1	AC005046.1	ABHD3	DUSP2		List of sig. regulated genes in total under HT
AL731571.1	ABHD3	ABTB2	AL731571.1	AC009093.4	AC005674.2	ABTB2	MT-TT		List of sig. regulated genes in total under HT+RT
CTGF	ABTB2	AC004148.2	CXCL2	AC010761.1	AC006111.2	AC004148.2	MT-TV		List of sig. unique regulated genes under RT
CXCL2	AC004148.2	AC004918.1		AC011676.5	AC007406.5	AC005841.1	NFKBIZ		List of sig. unique regulated genes under HT
DUSP2	AC004980.1	AC005046.1		AC015712.2	AC007493.1	AC007546.1	SNAI1		List of sig. unique regulated genes under HT+RT
MT-TT	AC005841.1	AC005674.2		AC018653.3	AC008764.8	AC007848.2			List of sig. common regulated genes under HT and HT+RT
MT-TV	AC007546.1	AC005841.1		AC022098.1	AC008957.3	AC008687.4			List of sig. common regulated genes under RT, HT & HT+RT
NFKBIZ	AC007848.2	AC006111.2		AC024909.2	AC010132.3	AC008897.3
SNAI1	AC008687.4	AC007406.5		AC025449.1	AC010973.2	AC009078.3
	AC008897.3	AC007493.1		AC040162.3	AC011498.7	AC009404.1
	AC009078.3	AC007546.1		AC040977.1	AC011912.1	AC010491.1
	AC009093.4	AC007848.2		AC084125.4	AC012360.3	AC011483.2
	AC009404.1	AC008687.4		AC087289.2	AC017104.3	AC011483.3
	AC010491.1	AC008764.8		AC087762.2	AC019069.1	AC011511.5
	AC010761.1	AC008897.3		AC089983.1	AC020763.3	AC011676.1
	AC011483.2	AC008957.3		AC090673.1	AC021087.2	AC011815.1
	AC011483.3	AC009078.3		AC092803.2	AC021087.3	AC016773.1
	AC011511.5	AC009404.1		AC107081.3	AC026271.3	AC018529.2
	AC011676.1	AC010132.3		AC108134.2	AC027307.3	AC018797.2
	AC011676.5	AC010491.1		AC115618.3	AC027644.1	AC021739.2
	AC011815.1	AC010973.2		AC246785.2	AC060814.3	AC021739.3
	AC015712.2	AC011483.2		ACAP1	AC067852.2	AC021739.5
	AC016773.1	AC011483.3		ADSSL1	AC072061.1	AC063976.2
	AC018529.2	AC011498.7		AKR7A3	AC073508.3	AC067930.5
	AC018653.3	AC011511.5		AL080317.3	AC073548.1	AC068228.1
	AC018797.2	AC011676.1		AL109614.1	AC087481.3	AC068647.2
	AC021739.2	AC011815.1		AL158835.1	AC090114.2	AC073130.1
	AC021739.3	AC011912.1		AL163051.2	AC093525.8	AC073957.3
	AC021739.5	AC012360.3		AL354920.1	AC104118.1	AC083843.3
	AC022098.1	AC016773.1		AL390719.1	AC105446.1	AC083843.4
	AC024909.2	AC017104.3		AL513320.1	AC107021.1	AC084880.1
	AC025449.1	AC018529.2		AL591684.2	AC124283.4	AC087388.1
	AC040162.3	AC018797.2		AL645940.1	AC132872.4	AC087741.1
	AC040977.1	AC019069.1		AL731569.1	AC138393.1	AC091825.1
	AC063976.2	AC020763.3		AL773545.3	AC239803.1	AC093591.2
	AC067930.5	AC021087.2		AMH	AC244453.2	AC093591.3
	AC068228.1	AC021087.3		AP000873.2	ACTG1P20	AC105219.1
	AC068647.2	AC021739.2		AP003084.1	AIFM3	AC107021.2
	AC073130.1	AC021739.3		ARL11	AL021707.6	AC107081.2
	AC073957.3	AC021739.5		ARL4D	AL117336.3	AC108002.1
	AC083843.3	AC026271.3		ATP2B3	AL121987.2	AC108062.1
	AC083843.4	AC027307.3		ATP5MC1P4	AL355916.1	AC108134.3
	AC084125.4	AC027644.1		C10orf111	AL357060.1	AC112484.1
	AC084880.1	AC060814.3		C17orf100	AL445933.1	AC112484.3
	AC087289.2	AC063976.2		CAPN12	AL512274.1	AC113430.1
	AC087388.1	AC067852.2		CCDC71	AL513550.1	AC114947.2
	AC087741.1	AC067930.5		CDKL3	AL592166.1	AC120057.3
	AC087762.2	AC068228.1		CEP19	AL662890.1	AC138150.2
	AC089983.1	AC068647.2		CHRNA10	ALOX12	AC139100.2
	AC090673.1	AC072061.1		CPT1B	ANKRD55	AC145098.2
	AC091825.1	AC073130.1		CYP1B1-AS1	AP001160.1	AC148477.2
	AC092803.2	AC073508.3		DDX20	AP001486.2	AC148477.3
	AC093591.2	AC073548.1		DDX28	AP002807.1	AC148477.4
	AC093591.3	AC073957.3		DEPP1	AP003392.1	AC241585.2
	AC105219.1	AC083843.3		DICER1-AS1	APBA3	AC242376.2
	AC107021.2	AC083843.4		DUBR	APOL4	AC243772.2
	AC107081.2	AC084880.1		DYRK1B	ARG2	ACE2
	AC107081.3	AC087388.1		EXOC8	ARHGAP30	ACER2
	AC108002.1	AC087481.3		FAM181B	ARL4A	ACHE
	AC108062.1	AC087741.1		FAM182B	ARRDC4	ACTRT3
	AC108134.2	AC090114.2		FAM229A	ASIC3	ADAMTS1
	AC108134.3	AC091825.1		FGD3	AVIL	ADAMTS15
	AC112484.1	AC093525.8		FOSL2	B3GNT10	ADCY10P1
	AC112484.3	AC093591.2		FOXO3B	BAAT	ADRB2
	AC113430.1	AC093591.3		FZD8	BAMBI	AEBP1
	AC114947.2	AC104118.1		GNB3	BEX2	AGAP1-IT1
	AC115618.3	AC105219.1		GSDMB	C1orf228	AHSA1
	AC120057.3	AC105446.1		GUSBP1	C2orf88	AHSA2P
	AC138150.2	AC107021.1		HIST1H2BD	C3orf38	AKAP17A
	AC139100.2	AC107021.2		HIST2H2BE	C7orf57	AKR7A2P1
	AC145098.2	AC107081.2		HOXC-AS1	CAVIN4	AKR7L
	AC148477.2	AC108002.1		HOXD9	CCDC30	AL008721.2
	AC148477.3	AC108062.1		HSD17B1P1	CCDC78	AL031714.1
	AC148477.4	AC108134.3		HVCN1	CCL20	AL118506.1
	AC241585.2	AC112484.1		IFFO1	CD99P1	AL132780.4
	AC242376.2	AC112484.3		IFIT5	CHAC1	AL133230.1
	AC243772.2	AC113430.1		IL1B	CHORDC1	AL133243.3
	AC246785.2	AC114947.2		INTS5	CHRM1	AL136116.3
	ACAP1	AC120057.3		IQSEC3	CHRNE	AL158166.1
	ACE2	AC124283.4		IRS3P	CIRBP-AS1	AL158166.2
	ACER2	AC132872.4		KCNE5	CITED2	AL158206.1
	ACHE	AC138150.2		KCNMB2-AS1	CLEC2D	AL353743.1
	ACTRT3	AC138393.1		KRT79	CREB5	AL354836.1
	ADAMTS1	AC139100.2		LAMTOR5-AS1	CRYM-AS1	AL359921.1
	ADAMTS15	AC145098.2		LAT2	CXCR2	AL360270.1
	ADCY10P1	AC148477.2		LENG9	DACT1	AL360270.2
	ADRB2	AC148477.3		LRRN4CL	DHDH	AL360270.3
	ADSSL1	AC148477.4		MARS2	DNAJB5	AL365203.2
	AEBP1	AC239803.1		MFAP1P1	DNHD1	AL390719.2
	AGAP1-IT1	AC241585.2		MIR17HG	EFCAB7	AL391095.1
	AHSA1	AC242376.2		MIR3153	EFNA4	AL391095.3
	AHSA2P	AC243772.2		MIR5188	FADD	AL513497.1
	AKAP17A	AC244453.2		MT-TA	FAM225A	AL591135.1
	AKR7A2P1	ACE2		MT-TG	FAM227A	AL591845.1
	AKR7A3	ACER2		NCF4	FAM86HP	AL591848.4
	AKR7L	ACHE		NUP50-AS1	FAM86JP	AL592301.1
	AL008721.2	ACTG1P20		ODF3B	FOXA1	AL592546.1
	AL031714.1	ACTRT3		PAQR8	FOXF1	AL596202.1
	AL080317.3	ADAMTS1		RAB3A	FOXJ1	AL603750.1
	AL109614.1	ADAMTS15		RANBP6	GATA5	AL603756.1
	AL118506.1	ADCY10P1		RARA-AS1	GJC2	AL604028.2
	AL132780.4	ADRB2		RBM12B-AS1	GKAP1	AL645608.8
	AL133230.1	AEBP1		RN7SL809P	GPR83	AL645608.9
	AL133243.3	AGAP1-IT1		RPS3AP38	GRIN3B	AL662899.2
	AL136116.3	AHSA1		RUSC1-AS1	GXYLT2	AL732292.2
	AL158166.1	AHSA2P		SEMA7A	HAP1	ALDOC
	AL158166.2	AIFM3		SH3GL1P1	HCG4	ALKAL2
	AL158206.1	AKAP17A		SLC25A27	HCG4P5	ALOXE3
	AL158835.1	AKR7A2P1		SLC9A3	HEY1	AMD1
	AL163051.2	AKR7L		SLC9A3-AS1	HSD3BP5	ANGPT4
	AL353743.1	AL008721.2		SLFNL1	IL1RL1	ANKRD1
	AL354836.1	AL021707.6		SNHG21	IL32	ANKRD10
	AL354920.1	AL031714.1		SNHG3	INHBA	ANKRD10-IT1
	AL359921.1	AL117336.3		SNORD63	IQCC	ANKRD42
	AL360270.1	AL118506.1		SNORD83A	IRX5	AOC2
	AL360270.2	AL121987.2		SPACA6	KCNB1	AOC3
	AL360270.3	AL132780.4		TCAP	KCNQ2	AP000254.1
	AL365203.2	AL133230.1		TIAM2	KCP	AP000648.3
	AL390719.1	AL133243.3		TMEM102	KIAA1586	AP000911.1
	AL390719.2	AL136116.3		TMEM240	KLF4	AP000941.1
	AL391095.1	AL158166.1		TSKU	KRT16	AP001273.1
	AL391095.3	AL158166.2		TSPYL4	LINC00707	AP002364.1
	AL513320.1	AL158206.1		UFSP1	LINC01079	AP002884.1
	AL513497.1	AL353743.1		UPK1A	LINC01151	AP002990.1
	AL591135.1	AL354836.1		VN1R54P	LPAR6	AP003469.4
	AL591684.2	AL355916.1		VPS18	LRFN1	AP4B1
	AL591845.1	AL357060.1		ZNF155	LRP2BP	AP4B1-AS1
	AL591848.4	AL359921.1		ZNF256	LRRN2	APCDD1L-AS1
	AL592301.1	AL360270.1		ZNF483	LTA	ARC
	AL592546.1	AL360270.2		ZNF574	LYPD3	ARL14EPL
	AL596202.1	AL360270.3		ZNF670-ZNF695	MALAT1	ARRDC3
	AL603750.1	AL365203.2		ZNF681	MAPK15	ATF3
	AL603756.1	AL390719.2			MCU	ATF7IP2
	AL604028.2	AL391095.1			MED11	AVPI1
	AL645608.8	AL391095.3			METRNL	AZIN1-AS1
	AL645608.9	AL445933.1			MINPP1	BAG3
	AL645940.1	AL512274.1			MIR106B	BCL10
	AL662899.2	AL513497.1			MIR25	BCL6
	AL731569.1	AL513550.1			MIRLET7D	BDKRB1
	AL732292.2	AL591135.1			MITF	BLOC1S3
	AL773545.3	AL591845.1			MORF4L2-AS1	BMP4
	ALDOC	AL591848.4			MUC1	BMT2
	ALKAL2	AL592166.1			MXD1	BTN2A2
	ALOXE3	AL592301.1			NAGS	BTN2A3P
	AMD1	AL592546.1			NDST2	BX255925.1
	AMH	AL596202.1			NOD2	C11orf96
	ANGPT4	AL603750.1			NOSTRIN	C17orf107
	ANKRD1	AL603756.1			NOV	C17orf51
	ANKRD10	AL604028.2			NPM1P24	C17orf67
	ANKRD10-IT1	AL645608.8			NPM1P9	C18orf25
	ANKRD42	AL645608.9			NTF3	C18orf32
	AOC2	AL662890.1			NUDC	C1orf226
	AOC3	AL662899.2			P2RX2	C20orf204
	AP000254.1	AL732292.2			PCDH12	CACFD1
	AP000648.3	ALDOC			PCNPP1	CACNA1G
	AP000873.2	ALKAL2			PDZD4	CACNA2D2
	AP000911.1	ALOX12			PFKFB4	CACYBP
	AP000941.1	ALOXE3			PHF8	CACYBPP2
	AP001273.1	AMD1			PPIEL	CARD6
	AP002364.1	ANGPT4			PPIEP	CARD9
	AP002884.1	ANKRD1			PPP1R3B	CASS4
	AP002990.1	ANKRD10			PRMT6	CCDC106
	AP003084.1	ANKRD10-IT1			PTGS2	CCDC117
	AP003469.4	ANKRD42			RADIL	CCDC121
	AP4B1	ANKRD55			RASAL2-AS1	CCDC150P1
	AP4B1-AS1	AOC2			RHBDD2	CCDC151
	APCDD1L-AS1	AOC3			RHOB	CCDC38
	ARC	AP000254.1			RTL8B	CCDC39
	ARL11	AP000648.3			SAMD11	CCDC8
	ARL14EPL	AP000911.1			SELPLG	CCDC81
	ARL4D	AP000941.1			SEMA6C	CCDC84
	ARRDC3	AP001160.1			SESN2	CCDC96
	ATF3	AP001273.1			SLC12A7	CCL2
	ATF7IP2	AP001486.2			SLC26A1	CCL26
	ATP2B3	AP002364.1			SLC52A3	CCNO
	ATP5MC1P4	AP002807.1			SLC6A13	CCT6P1
	AVPI1	AP002884.1			SNHG4	CDC42EP3
	AZIN1-AS1	AP002990.1			SNORA20	CDHR5
	BAG3	AP003392.1			SOCS2-AS1	CDKN1C
	BCL10	AP003469.4			SPTBN5	CDKN2C
	BCL6	AP4B1			SQOR	CEBPD
	BDKRB1	AP4B1-AS1			TAS1R3	CENPC
	BLOC1S3	APBA3			TBPL1	CEP295NL
	BMP4	APCDD1L-AS1			TCEAL9	CFAP53
	BMT2	APOL4			TCTN1	CFP
	BTN2A2	ARC			TEN1-CDK3	CGAS
	BTN2A3P	ARG2			TET1	CHI3L1
	BX255925.1	ARHGAP30			TLR4	CHMP4BP1
	C10orf111	ARL14EPL			TMIE	CHRNA3
	C11orf96	ARL4A			TMPPE	CHRNB1
	C17orf100	ARRDC3			TNFRSF10D	CIART
	C17orf107	ARRDC4			U62317.3	CIDECP
	C17orf51	ASIC3			UBE2D1	CKS1BP1
	C17orf67	ATF3			UBOX5	CLDN15
	C18orf25	ATF7IP2			UCN	CLK1
	C18orf32	AVIL			VGF	CLK4
	C1orf226	AVPI1			WDR53	CLU
	C20orf204	AZIN1-AS1			WHAMMP3	COL11A2
	CACFD1	B3GNT10			Z92544.2	COL1A1
	CACNA1G	BAAT			ZNF17	COL26A1
	CACNA2D2	BAG3			ZNF394	COL2A1
	CACYBP	BAMBI			ZNF460	CPEB3
	CACYBPP2	BCL10			ZNF70	CPEB4
	CAPN12	BCL6			ZNF772	CREB3L4
	CARD6	BDKRB1			ZNF778	CREG2
	CARD9	BEX2			ZNF844	CROCCP3
	CASS4	BLOC1S3				CRYAB
	CCDC106	BMP4				CSF1
	CCDC117	BMT2				CSPG5
	CCDC121	BTN2A2				CSRNP1
	CCDC150P1	BTN2A3P				CSRP2
	CCDC151	BX255925.1				CTC-487M23.5
	CCDC38	C11orf96				CTC-487M23.6
	CCDC39	C17orf107				CU634019.6
	CCDC71	C17orf51				CXCL1
	CCDC8	C17orf67				CXCL8
	CCDC81	C18orf25				CYP39A1
	CCDC84	C18orf32				DACT2
	CCDC96	C1orf226				DCAF4L1
	CCL2	C1orf228				DCLRE1B
	CCL26	C20orf204				DDAH2
	CCNO	C2orf88				DEDD2
	CCT6P1	C3orf38				DKK1
	CDC42EP3	C7orf57				DLEU2L
	CDHR5	CACFD1				DLX2
	CDKL3	CACNA1G				DLX3
	CDKN1C	CACNA2D2				DLX4
	CDKN2C	CACYBP				DMBX1
	CEBPD	CACYBPP2				DNAJA1
	CENPC	CARD6				DNAJA4
	CEP19	CARD9				DNAJB1
	CEP295NL	CASS4				DNAJB2
	CFAP53	CAVIN4				DNAJB4
	CFP	CCDC106				DNLZ
	CGAS	CCDC117				DUSP1
	CHI3L1	CCDC121				DUSP6
	CHMP4BP1	CCDC150P1				DUSP8
	CHRNA10	CCDC151				EDN1
	CHRNA3	CCDC30				EFCAB12
	CHRNB1	CCDC38				EGR2
	CIART	CCDC39				EID3
	CIDECP	CCDC78				EIF1AD
	CKS1BP1	CCDC8				EMX1
	CLDN15	CCDC81				ENGASE
	CLK1	CCDC84				EPHB3
	CLK4	CCDC96				ETAA1
	CLU	CCL2				FAM109B
	COL11A2	CCL20				FAM212A
	COL1A1	CCL26				FAM222A
	COL26A1	CCNO				FAM43A
	COL2A1	CCT6P1				FAM46A
	CPEB3	CD99P1				FAM46B
	CPEB4	CDC42EP3				FAM46C
	CPT1B	CDHR5				FAM83A
	CREB3L4	CDKN1C				FAM83A-AS1
	CREG2	CDKN2C				FBLL1
	CROCCP3	CEBPD				FBXL14
	CRYAB	CENPC				FCGR1A
	CSF1	CEP295NL				FCRLB
	CSPG5	CFAP53				FERMT3
	CSRNP1	CFP				FGF19
	CSRP2	CGAS				FJX1
	CTC-487M23.5	CHAC1				FKBP4
	CTC-487M23.6	CHI3L1				FOS
	CTGF	CHMP4BP1				FOSB
	CU634019.6	CHORDC1				FOXC2
	CXCL1	CHRM1				FOXD3
	CXCL8	CHRNA3				FOXQ1
	CYP1B1-AS1	CHRNB1				FRAT2
	CYP39A1	CHRNE				FZD10-AS1
	DACT2	CIART				G0S2
	DCAF4L1	CIDECP				GABRE
	DCLRE1B	CIRBP-AS1				GADD45B
	DDAH2	CITED2				GADD45G
	DDX20	CKS1BP1				GALNT9
	DDX28	CLDN15				GAS1
	DEDD2	CLEC2D				GAS6-AS1
	DEPP1	CLK1				GAS6-AS2
	DICER1-AS1	CLK4				GATA2
	DKK1	CLU				GBP3
	DLEU2L	COL11A2				GCNA
	DLX2	COL1A1				GCNT4
	DLX3	COL26A1				GEM
	DLX4	COL2A1				GEMIN8P4
	DMBX1	CPEB3				GGN
	DNAJA1	CPEB4				GLI2
	DNAJA4	CREB3L4				GNMT
	DNAJB1	CREB5				GOLGA6L9
	DNAJB2	CREG2				GPBP1
	DNAJB4	CROCCP3				GPR35
	DNLZ	CRYAB				GPR89A
	DUBR	CRYM-AS1				GPR89B
	DUSP1	CSF1				GPT
	DUSP2	CSPG5				GRM2
	DUSP6	CSRNP1				GUCA1B
	DUSP8	CSRP2				GVQW3
	DYRK1B	CTC-487M23.5				HCAR2
	EDN1	CTC-487M23.6				HCAR3
	EFCAB12	CTGF				HCFC1R1
	EGR2	CU634019.6				HCG4P7
	EID3	CXCL1				HCN2
	EIF1AD	CXCL8				HCP5
	EMX1	CXCR2				HES7
	ENGASE	CYP39A1				HILPDA
	EPHB3	DACT1				HIST2H2BF
	ETAA1	DACT2				HLA-A
	EXOC8	DCAF4L1				HLA-F-AS1
	FAM109B	DCLRE1B				HLA-V
	FAM181B	DDAH2				HMOX1
	FAM182B	DEDD2				HOTAIR
	FAM212A	DHDH				HOTAIRM1
	FAM222A	DKK1				HOXA1
	FAM229A	DLEU2L				HOXA2
	FAM43A	DLX2				HOXC13
	FAM46A	DLX3				HOXC13-AS
	FAM46B	DLX4				HOXC9
	FAM46C	DMBX1				HPS6
	FAM83A	DNAJA1				HSBP1L1
	FAM83A-AS1	DNAJA4				HSD17B7
	FBLL1	DNAJB1				HSP90AA2P
	FBXL14	DNAJB2				HSPA1A
	FCGR1A	DNAJB4				HSPA1B
	FCRLB	DNAJB5				HSPA1L
	FERMT3	DNHD1				HSPA4
	FGD3	DNLZ				HSPA4L
	FGF19	DUSP1				HSPA6
	FJX1	DUSP2				HSPA7
	FKBP4	DUSP6				HSPA8P5
	FOS	DUSP8				HSPB1
	FOSB	EDN1				HSPB8
	FOSL2	EFCAB12				HSPB9
	FOXC2	EFCAB7				HSPD1
	FOXD3	EFNA4				HSPD1P1
	FOXO3B	EGR2				HSPE1-MOB4
	FOXQ1	EID3				HSPH1
	FRAT2	EIF1AD				HTR1D
	FZD10-AS1	EMX1				HYPK
	FZD8	ENGASE				ICAM1
	G0S2	EPHB3				ICOSLG
	GABRE	ETAA1				ID2
	GADD45B	FADD				ID3
	GADD45G	FAM109B				IER3
	GALNT9	FAM212A				IER5
	GAS1	FAM222A				IFIT2
	GAS6-AS1	FAM225A				IFIT3
	GAS6-AS2	FAM227A				IGF2
	GATA2	FAM43A				IGHG4
	GBP3	FAM46A				IL11
	GCNA	FAM46B				IL11RA
	GCNT4	FAM46C				IL1A
	GEM	FAM83A				IL6
	GEMIN8P4	FAM83A-AS1				INTS6-AS1
	GGN	FAM86HP				IQCN
	GLI2	FAM86JP				JMJD6
	GNB3	FBLL1				JSRP1
	GNMT	FBXL14				JUN
	GOLGA6L9	FCGR1A				KANSL1L
	GPBP1	FCRLB				KCND1
	GPR35	FERMT3				KCNH3
	GPR89A	FGF19				KCNJ14
	GPR89B	FJX1				KCNJ15
	GPT	FKBP4				KCNJ2
	GRM2	FOS				KCNK7
	GSDMB	FOSB				KCTD11
	GUCA1B	FOXA1				KDM4D
	GUSBP1	FOXC2				KHDC4
	GVQW3	FOXD3				KIAA0895
	HCAR2	FOXF1				KIF9-AS1
	HCAR3	FOXJ1				KLHL15
	HCFC1R1	FOXQ1				KLHL25
	HCG4P7	FRAT2				KLKP1
	HCN2	FZD10-AS1				KPNA5
	HCP5	G0S2				KRTAP1-5
	HES7	GABRE				LAG3
	HILPDA	GADD45B				LAMA1
	HIST1H2BD	GADD45G				LEAP2
	HIST2H2BE	GALNT9				LFNG
	HIST2H2BF	GAS1				LHB
	HLA-A	GAS6-AS1				LHX4
	HLA-F-AS1	GAS6-AS2				LILRB3
	HLA-V	GATA2				LINC00163
	HMOX1	GATA5				LINC00452
	HOTAIR	GBP3				LINC00519
	HOTAIRM1	GCNA				LINC00565
	HOXA1	GCNT4				LINC00622
	HOXA2	GEM				LINC00641
	HOXC13	GEMIN8P4				LINC00896
	HOXC13-AS	GGN				LINC01068
	HOXC9	GJC2				LINC01106
	HOXC-AS1	GKAP1				LINC01123
	HOXD9	GLI2				LINC01176
	HPS6	GNMT				LINC01341
	HSBP1L1	GOLGA6L9				LINC01451
	HSD17B1P1	GPBP1				LINC01518
	HSD17B7	GPR35				LINC01679
	HSP90AA2P	GPR83				LINC01772
	HSPA1A	GPR89A				LIPG
	HSPA1B	GPR89B				LIPH
	HSPA1L	GPT				LMAN2L
	HSPA4	GRIN3B				LNCSRLR
	HSPA4L	GRM2				LRG1
	HSPA6	GUCA1B				LRIF1
	HSPA7	GVQW3				LRP5L
	HSPA8P5	GXYLT2				LSMEM1
	HSPB1	HAP1				LSMEM2
	HSPB8	HCAR2				LYPD1
	HSPB9	HCAR3				LYPD5
	HSPD1	HCFC1R1				MAF
	HSPD1P1	HCG4				MAFA
	HSPE1-MOB4	HCG4P5				MAFB
	HSPH1	HCG4P7				MAFF
	HTR1D	HCN2				MAGEE1
	HVCN1	HCP5				MAP1A
	HYPK	HES7				MAP1B
	ICAM1	HEY1				MAP7D2
	ICOSLG	HILPDA				MATR3
	ID2	HIST2H2BF				MBOAT7
	ID3	HLA-A				MC1R
	IER3	HLA-F-AS1				MCL1
	IER5	HLA-V				MEFV
	IFFO1	HMOX1				MEX3B
	IFIT2	HOTAIR				MICB
	IFIT3	HOTAIRM1				MICE
	IFIT5	HOXA1				MIEF2
	IGF2	HOXA2				MIR100HG
	IGHG4	HOXC13				MIR200A
	IL11	HOXC13-AS				MIR200B
	IL11RA	HOXC9				MIR210HG
	IL1A	HPS6				MIR429
	IL1B	HSBP1L1				MIR503HG
	IL6	HSD17B7				MMP25-AS1
	INTS5	HSD3BP5				MRPL18
	INTS6-AS1	HSP90AA2P				MST1
	IQCN	HSPA1A				MSX1
	IQSEC3	HSPA1B				MT-TD
	IRS3P	HSPA1L				MT-TF
	JMJD6	HSPA4				MT-TI
	JSRP1	HSPA4L				MT-TL1
	JUN	HSPA6				MT-TM
	KANSL1L	HSPA7				MT-TQ
	KCND1	HSPA8P5				MT-TS1
	KCNE5	HSPB1				MUC12
	KCNH3	HSPB8				MUM1L1
	KCNJ14	HSPB9				MYCL
	KCNJ15	HSPD1				NAA16
	KCNJ2	HSPD1P1				NAALAD2
	KCNK7	HSPE1-MOB4				NAB2
	KCNMB2-AS1	HSPH1				NATD1
	KCTD11	HTR1D				NBPF25P
	KDM4D	HYPK				NHLH1
	KHDC4	ICAM1				NKRF
	KIAA0895	ICOSLG				NNAT
	KIF9-AS1	ID2				NOCT
	KLHL15	ID3				NPPA-AS1
	KLHL25	IER3				NR4A1
	KLKP1	IER5				NR4A2
	KPNA5	IFIT2				NR4A3
	KRT79	IFIT3				NUDT17
	KRTAP1-5	IGF2				NUDT4
	LAG3	IGHG4				NUDT9
	LAMA1	IL11				NXNL2
	LAMTOR5-AS1	IL11RA				NXT2
	LAT2	IL1A				OLMALINC
	LEAP2	IL1RL1				OR7E122P
	LENG9	IL32				OSR2
	LFNG	IL6				OVGP1
	LHB	INHBA				OVOL1
	LHX4	INTS6-AS1				OXTR
	LILRB3	IQCC				P2RY1
	LINC00163	IQCN				P2RY11
	LINC00452	IRX5				PAPD5
	LINC00519	JMJD6				PARD6G
	LINC00565	JSRP1				PARD6G-AS1
	LINC00622	JUN				PGF
	LINC00641	KANSL1L				PHKG1
	LINC00896	KCNB1				PIK3R3
	LINC01068	KCND1				PIM2
	LINC01106	KCNH3				PKDCC
	LINC01123	KCNJ14				PLCB1
	LINC01176	KCNJ15				PLCD1
	LINC01341	KCNJ2				PMAIP1
	LINC01451	KCNK7				PMVK
	LINC01518	KCNQ2				PNLDC1
	LINC01679	KCP				PPP1R10
	LINC01772	KCTD11				PPP1R15A
	LIPG	KDM4D				PPP1R3C
	LIPH	KHDC4				PRDM1
	LMAN2L	KIAA0895				PROCA1
	LNCSRLR	KIAA1586				PRRG4
	LRG1	KIF9-AS1				PTGES3P1
	LRIF1	KLF4				PTOV1-AS2
	LRP5L	KLHL15				PUS3
	LRRN4CL	KLHL25				PYGM
	LSMEM1	KLKP1				QRICH2
	LSMEM2	KPNA5				RAB30
	LYPD1	KRT16				RAB7B
	LYPD5	KRTAP1-5				RAET1K
	MAF	LAG3				RASD1
	MAFA	LAMA1				RASL11A
	MAFB	LEAP2				RASL11B
	MAFF	LFNG				RASSF9
	MAGEE1	LHB				RBFOX3
	MAP1A	LHX4				RBM22P2
	MAP1B	LILRB3				RBM24
	MAP7D2	LINC00163				REC8
	MARS2	LINC00452				RF02271
	MATR3	LINC00519				RFPL2
	MBOAT7	LINC00565				RFTN2
	MC1R	LINC00622				RGS16
	MCL1	LINC00641				RGS2
	MEFV	LINC00707				RHEBL1
	MEX3B	LINC00896				RND1
	MFAP1P1	LINC01068				RNF182
	MICB	LINC01079				RNF216P1
	MICE	LINC01106				RNF223
	MIEF2	LINC01123				RNF39
	MIR100HG	LINC01151				RP1L1
	MIR17HG	LINC01176				RP9P
	MIR200A	LINC01341				RPS4XP16
	MIR200B	LINC01451				RRAD
	MIR210HG	LINC01518				RSPH4A
	MIR3153	LINC01679				S1PR5
	MIR429	LINC01772				SBK3
	MIR503HG	LIPG				SCUBE1
	MIR5188	LIPH				SEC31B
	MMP25-AS1	LMAN2L				SELENOW
	MRPL18	LNCSRLR				SERPINH1
	MST1	LPAR6				SERTAD1
	MSX1	LRFN1				SESN3
	MT-TA	LRG1				SH3BP5-AS1
	MT-TD	LRIF1				SH3RF3-AS1
	MT-TF	LRP2BP				SHISA2
	MT-TG	LRP5L				SIN3A
	MT-TI	LRRN2				SIX4
	MT-TL1	LSMEM1				SLC10A1
	MT-TM	LSMEM2				SLC22A17
	MT-TQ	LTA				SLC22A20P
	MT-TS1	LYPD1				SLC25A25-AS1
	MT-TT	LYPD3				SLC30A1
	MT-TV	LYPD5				SLC8B1
	MUC12	MAF				SMG1P7
	MUM1L1	MAFA				SMPD3
	MYCL	MAFB				SNORA31
	NAA16	MAFF				SNORD14E
	NAALAD2	MAGEE1				SNORD63B
	NAB2	MALAT1				SOCS1
	NATD1	MAP1A				SOCS3
	NBPF25P	MAP1B				SOWAHD
	NCF4	MAP7D2				SPATA46
	NFKBIZ	MAPK15				SPON1
	NHLH1	MATR3				SPRED3
	NKRF	MBOAT7				SRRM3
	NNAT	MC1R				STAT2
	NOCT	MCL1				STX11
	NPPA-AS1	MCU				SUMO4
	NR4A1	MED11				SYDE2
	NR4A2	MEFV				SYNM
	NR4A3	METRNL				TADA1
	NUDT17	MEX3B				TBX19
	NUDT4	MICB				TBX3
	NUDT9	MICE				TCEA1P4
	NUP50-AS1	MIEF2				TCTE3
	NXNL2	MINPP1				TDRG1
	NXT2	MIR100HG				TEX19
	ODF3B	MIR106B				THAP2
	OLMALINC	MIR200A				THAP9-AS1
	OR7E122P	MIR200B				THOC6
	OSR2	MIR210HG				TIAF1
	OVGP1	MIR25				TIGD3
	OVOL1	MIR429				TIGD5
	OXTR	MIR503HG				TJP3
	P2RY1	MIRLET7D				TMEM163
	P2RY11	MITF				TMEM217
	PAPD5	MMP25-AS1				TMEM37
	PAQR8	MORF4L2-AS1				TMEM51-AS1
	PARD6G	MRPL18				TMEM81
	PARD6G-AS1	MST1				TMPRSS9
	PGF	MSX1				TNFAIP3
	PHKG1	MT-TD				TNFSF14
	PIK3R3	MT-TF				TPM3P9
	PIM2	MT-TI				TPT1-AS1
	PKDCC	MT-TL1				TPT1P5
	PLCB1	MT-TM				TRA2A
	PLCD1	MT-TQ				TRAF3IP3
	PMAIP1	MT-TS1				TREH
	PMVK	MT-TT				TREM1
	PNLDC1	MT-TV				TRIB2
	PPP1R10	MUC1				TRIM15
	PPP1R15A	MUC12				TRIM16
	PPP1R3C	MUM1L1				TRIM26
	PRDM1	MXD1				TRPV3
	PROCA1	MYCL				TSACC
	PRRG4	NAA16				TSHZ1
	PTGES3P1	NAALAD2				TSPYL2
	PTOV1-AS2	NAB2				TTC28-AS1
	PUS3	NAGS				TTLL10-AS1
	PYGM	NATD1				TXNIP
	QRICH2	NBPF25P				UBB
	RAB30	NDST2				UBC
	RAB3A	NFKBIZ				UCP3
	RAB7B	NHLH1				UGT8
	RAET1K	NKRF				ULBP3
	RANBP6	NNAT				USPL1
	RARA-AS1	NOCT				VASN
	RASD1	NOD2				VPS37D
	RASL11A	NOSTRIN				VTRNA1-2
	RASL11B	NOV				VWA5B2
	RASSF9	NPM1P24				WASIR2
	RBFOX3	NPM1P9				WDCP
	RBM12B-AS1	NPPA-AS1				WDR38
	RBM22P2	NR4A1				WHRN
	RBM24	NR4A2				WNK4
	REC8	NR4A3				WNT2B
	RF02271	NTF3				WNT6
	RFPL2	NUDC				WNT9A
	RFTN2	NUDT17				XPNPEP3
	RGS16	NUDT4				YJEFN3
	RGS2	NUDT9				ZBTB45
	RHEBL1	NXNL2				ZBTB45P1
	RN7SL809P	NXT2				ZBTB8B
	RND1	OLMALINC				ZC3H4
	RNF182	OR7E122P				ZDHHC11
	RNF216P1	OSR2				ZDHHC11B
	RNF223	OVGP1				ZFAND2A
	RNF39	OVOL1				ZFP36
	RP1L1	OXTR				ZGLP1
	RP9P	P2RX2				ZNF10
	RPS3AP38	P2RY1				ZNF19
	RPS4XP16	P2RY11				ZNF204P
	RRAD	PAPD5				ZNF227
	RSPH4A	PARD6G				ZNF436
	RUSC1-AS1	PARD6G-AS1				ZNF436-AS1
	S1PR5	PCDH12				ZNF443
	SBK3	PCNPP1				ZNF473
	SCUBE1	PDZD4				ZNF500
	SEC31B	PFKFB4				ZNF556
	SELENOW	PGF				ZNF557
	SEMA7A	PHF8				ZNF572
	SERPINH1	PHKG1				ZNF608
	SERTAD1	PIK3R3				ZNF624
	SESN3	PIM2				ZNF658
	SH3BP5-AS1	PKDCC				ZNF697
	SH3GL1P1	PLCB1				ZNF761
	SH3RF3-AS1	PLCD1				ZNF784
	SHISA2	PMAIP1				ZNF792
	SIN3A	PMVK				ZNF799
	SIX4	PNLDC1				ZNF852
	SLC10A1	PPIEL, PPIEP				ZNFX1
	SLC22A17	PPP1R10
	SLC22A20P	PPP1R15A
	SLC25A25-AS1	PPP1R3B
	SLC25A27	PPP1R3C
	SLC30A1	PRDM1
	SLC8B1	PRMT6
	SLC9A3	PROCA1
	SLC9A3-AS1	PRRG4
	SLFNL1	PTGES3P1
	SMG1P7	PTGS2
	SMPD3	PTOV1-AS2
	SNAI1	PUS3
	SNHG21	PYGM
	SNHG3	QRICH2
	SNORA31	RAB30
	SNORD14E	RAB7B
	SNORD63	RADIL
	SNORD63B	RAET1K
	SNORD83A	RASAL2-AS1
	SOCS1	RASD1
	SOCS3	RASL11A
	SOWAHD	RASL11B
	SPACA6	RASSF9
	SPATA46	RBFOX3
	SPON1	RBM22P2
	SPRED3	RBM24
	SRRM3	REC8
	STAT2	RF02271
	STX11	RFPL2
	SUMO4	RFTN2
	SYDE2	RGS16
	SYNM	RGS2
	TADA1	RHBDD2
	TBX19	RHEBL1
	TBX3	RHOB
	TCAP	RND1
	TCEA1P4	RNF182
	TCTE3	RNF216P1
	TDRG1	RNF223
	TEX19	RNF39
	THAP2	RP1L1
	THAP9-AS1	RP9P
	THOC6	RPS4XP16
	TIAF1	RRAD
	TIAM2	RSPH4A
	TIGD3	RTL8B
	TIGD5	S1PR5
	TJP3	SAMD11
	TMEM102	SBK3
	TMEM163	SCUBE1
	TMEM217	SEC31B
	TMEM240	SELENOW
	TMEM37	SELPLG
	TMEM51-AS1	SEMA6C
	TMEM81	SERPINH1
	TMPRSS9	SERTAD1
	TNFAIP3	SESN2
	TNFSF14	SESN3
	TPM3P9	SH3BP5-AS1
	TPT1-AS1	SH3RF3-AS1
	TPT1P5	SHISA2
	TRA2A	SIN3A
	TRAF3IP3	SIX4
	TREH	SLC10A1
	TREM1	SLC12A7
	TRIB2	SLC22A17
	TRIM15	SLC22A20P
	TRIM16	SLC25A25-AS1
	TRIM26	SLC26A1
	TRPV3	SLC30A1
	TSACC	SLC52A3
	TSHZ1	SLC6A13
	TSKU	SLC8B1
	TSPYL2	SMG1P7
	TSPYL4	SMPD3
	TTC28-AS1	SNAI1
	TTLL10-AS1	SNHG4
	TXNIP	SNORA20
	UBB	SNORA31
	UBC	SNORD14E
	UCP3	SNORD63B
	UFSP1	SOCS1
	UGT8	SOCS2-AS1
	ULBP3	SOCS3
	UPK1A	SOWAHD
	USPL1	SPATA46
	VASN	SPON1
	VN1R54P	SPRED3
	VPS18	SPTBN5
	VPS37D	SQOR
	VTRNA1-2	SRRM3
	VWA5B2	STAT2
	WASIR2	STX11
	WDCP	SUMO4
	WDR38	SYDE2
	WHRN	SYNM
	WNK4	TADA1
	WNT2B	TAS1R3
	WNT6	TBPL1
	WNT9A	TBX19
	XPNPEP3	TBX3
	YJEFN3	TCEA1P4
	ZBTB45	TCEAL9
	ZBTB45P1	TCTE3
	ZBTB8B	TCTN1
	ZC3H4	TDRG1
	ZDHHC11	TEN1-CDK3
	ZDHHC11B	TET1
	ZFAND2A	TEX19
	ZFP36	THAP2
	ZGLP1	THAP9-AS1
	ZNF10	THOC6
	ZNF155	TIAF1
	ZNF19	TIGD3
	ZNF204P	TIGD5
	ZNF227	TJP3
	ZNF256	TLR4
	ZNF436	TMEM163
	ZNF436-AS1	TMEM217
	ZNF443	TMEM37
	ZNF473	TMEM51-AS1
	ZNF483	TMEM81
	ZNF500	TMIE
	ZNF556	TMPPE
	ZNF557	TMPRSS9
	ZNF572	TNFAIP3
	ZNF574	TNFRSF10D
	ZNF608	TNFSF14
	ZNF624	TPM3P9
	ZNF658	TPT1-AS1
	ZNF670-ZNF695	TPT1P5
	ZNF681	TRA2A
	ZNF697	TRAF3IP3
	ZNF761	TREH
	ZNF784	TREM1
	ZNF792	TRIB2
	ZNF799	TRIM15
	ZNF852	TRIM16
	ZNFX1	TRIM26
		TRPV3
		TSACC
		TSHZ1
		TSPYL2
		TTC28-AS1
		TTLL10-AS1
		TXNIP
		U62317.3
		UBB
		UBC
		UBE2D1
		UBOX5
		UCN
		UCP3
		UGT8
		ULBP3
		USPL1
		VASN
		VGF
		VPS37D
		VTRNA1-2
		VWA5B2
		WASIR2
		WDCP
		WDR38
		WDR53
		WHAMMP3
		WHRN
		WNK4
		WNT2B
		WNT6
		WNT9A
		XPNPEP3
		YJEFN3
		Z92544.2
		ZBTB45
		ZBTB45P1
		ZBTB8B
		ZC3H4
		ZDHHC11
		ZDHHC11B
		ZFAND2A
		ZFP36
		ZGLP1
		ZNF10
		ZNF17
		ZNF19
		ZNF204P
		ZNF227
		ZNF394
		ZNF436
		ZNF436-AS1
		ZNF443
		ZNF460
		ZNF473
		ZNF500
		ZNF556
		ZNF557
		ZNF572
		ZNF608
		ZNF624
		ZNF658
		ZNF697
		ZNF70
		ZNF761
		ZNF772
		ZNF778
		ZNF784
		ZNF792
		ZNF799
		ZNF844
		ZNF852
		ZNFX1
