# Supplementary material for: Efficient Heat Shock Response Affects Hyperthermia-Induced Radiosensitization in a Tumor Spheroid Control Probability Assay
Source: Cancers (Basel). 2021 Jun 25;13(13):3168. doi: 10.3390/cancers13133168 (PMC8269038; doi:10.3390/cancers13133168)
Supplement: Supplementary file 1 [file cancers-13-03168-s001.zip › Table S6.xlsx]

## Sheet: FaDu HT
Genes	Process_name	Significant_genes_count	Total_genes_group_count	Padj-value
CBX4; OVOL1; SMAD7; TBX3; SNAI1; TP53; EDN1; UBB; UBC; BMP4; JUNB; JUND; EGR1; ATF3; ZFP36; ID1; NR4A2; CDKN1C; FOSB; BTG2; ID2; IRF8; DLX2; FOXF1; TBX2; HES1; HIC1; TAF7; PROX2; CRY2; NRARP; OSR2; NR4A3; FOXC2; FZD8; PLK3; SOX17; DLL4; DDX20; FOXD3;	GO:0000122~negative regulation of transcription from RNA polymerase II promoter	40	707	0
CYR61; SMAD7; MAFK; NKX2-2; FOS; TP53; IL6; EDN1; JUN; POU2F2; UBB; UBC; EGR2; BMP4; FOSL1; JUNB; JUND; EGR1; ATF3; EN2; HOXA5; IL11; S1PR1; NR4A1; HOXC13; NR4A2; SOX9; SLC11A1; GBX2; FOSB; ESRRG; IRF8; POU3F1; DLX2; FOXF1; FADD; HES1; TAF7; FOXD1; PROX2; ZC3H12A; PPRC1; OSR2; MAFA; NR4A3; HSPH1; CSRNP1; NKX3-1; FOXC2; GATA5; FZD8; SOX17; SERTAD1; FOXD3; CCNL1; MAFF; MAFB; KLF2;	GO:0045944~positive regulation of transcription from RNA polymerase II promoter	58	962	0
GADD45B; GADD45G; TP53; IL6; UBB; UBC; BMP4; FOSL1; HOXA5; DUSP1; DNAJA1; PTGS2; RHOB; FADD; PMAIP1; DCUN1D3; DDX20;	GO:0043065~positive regulation of apoptotic process	17	290	0.000104020395678829
BAG3; CRYAB; HSPA1A; HSPA1B; DNAJB1; HSPA1L; FKBP4; HSPH1; HSPB8;	GO:1900034~regulation of cellular response to heat	9	76	0.000192122188852905
JUN; CXCL8; S1PR1; SAT1; CTGF; PTGS2; ID1; PGF; RHOB; ZC3H12A; ANGPTL4; FZD8; SOX17; DLL4;	GO:0001525~angiogenesis	14	215	0.000228753161406434
HSPA1A; HSPA1B; HSPA6; HSPA1L; DNAJA4;	GO:0042026~protein refolding	5	15	0.000420511296059537
CXCL8; NR4A1; ZFP36; EGR3; ZFP36L1; DLL4;	GO:0044344~cellular response to fibroblast growth factor stimulus	6	29	0.000472391145356799
CYR61; SNAI1; EDN1; THBS1; S1PR1; FOXF1; MYADM; HBEGF; ZNF703; SPHK1; CCL26; IRS2;	GO:0030335~positive regulation of cell migration	12	183	0.000915438675834457
HSPB1; NR4A1; GAS1; EGR3; DLL4;	GO:0035924~cellular response to vascular endothelial growth factor stimulus	5	22	0.00164943350789665
HSPA1A; HSPA1B; DNAJB1; DNAJA4;	GO:0090084~negative regulation of inclusion body assembly	4	10	0.00164943350789665
JUN; JUNB; JUND; CXCL2; CXCL3; SAT1; PTGER2; SOX9; USP17L2; SRMS; TNFRSF18;	GO:0042127~regulation of cell proliferation	11	168	0.00171754969496821
UBB; UBC; SOX9; TBX2; HES1; NRARP; FOXC2; CHAC1; DLL4;	GO:0007219~Notch signaling pathway	9	112	0.0020065011341873
JUN; JUNB; JUND; CDC25A; PLK3;	GO:0009314~response to radiation	5	29	0.00336481474955675
HSPA1A; HSPA1B; HSPA6;	GO:0070370~cellular heat acclimation	3	4	0.00336481474955675
WNT9A; CBFA2T3; TP53; IL6; JUN; CXCL8; BMP4; FOSL1; PTGS2; BTG2; IFNL1; NKX3-1; SOX7; DLL4; DDX20; ADAMTS1;	GO:0008285~negative regulation of cell proliferation	16	377	0.0034012399245193
TP53; EDN1; PTGS2; PCK1; ZFP36L1; PMAIP1; CPEB2; NKX3-1;	GO:0071456~cellular response to hypoxia	8	98	0.0034551468919981
FOS; EDN1; JUN; JUNB; JUND; FOSB;	GO:0071277~cellular response to calcium ion	6	50	0.00380593647648971
ZFP36; ID1; SOX9; ZFP36L1; ERRFI1;	GO:0071364~cellular response to epidermal growth factor stimulus	5	34	0.00562168799038698
HSPB1; THBS1; CXCL8; PGF; RHOB; ZC3H12A; ANGPTL4; SPHK1;	GO:0045766~positive regulation of angiogenesis	8	109	0.00581070044898903
CRYAB; KCNC3; KCTD11; SCUBE1; SCUBE3; KCNG3; ANGPTL4; KCNF1; KCND1; P2RX2;	GO:0051260~protein homooligomerization	10	172	0.00581070044898903
BMP4; NR4A1; PTGS2; RHOB; TSPYL2;	GO:0045786~negative regulation of cell cycle	5	35	0.0059386893693581
SMAD7; UBB; UBC; HSPA1A; BAMBI; LEMD3;	GO:0030512~negative regulation of transforming growth factor beta receptor signaling pathway	6	62	0.00869836323808018
EDN1; CXCL8; CXCL3; EDN2; CCL20; CCL26;	GO:0030593~neutrophil chemotaxis	6	62	0.00869836323808018
CYR61; WNT9A; EDN1; ADRA2B; IL11; CTGF; PGF; EFNA4; CCL20; GPR50; GJC2; PCDH12; CCL26;	GO:0007267~cell-cell signaling	13	298	0.00880141255323045
CLDN4; CLDN9; CLDN15; CLDN6;	GO:0016338~calcium-independent cell-cell adhesion via plasma membrane cell-adhesion molecules	4	21	0.00891773942382848
CRYAB; UBB; UBC; MAP3K8;	GO:0051403~stress-activated MAPK cascade	4	21	0.00891773942382848
SMAD7; FOS; JUN; UBB; UBC; ID1; BAMBI;	GO:0007179~transforming growth factor beta receptor signaling pathway	7	90	0.00893915977861502
THBS1; CXCL8; CXCL2; CXCL3; IL32; CFP; CCR7; PTGER4; GEM; CCL20; IL1RL1; IRF8; IL16; CCL26; TNFRSF18;	GO:0006955~immune response	15	385	0.00930407182288033
COL2A1; EIF4A1; ZFP36L1; PHLDA2; ZC3H12A; TSKU; FAM46A;	GO:0010468~regulation of gene expression	7	92	0.00986840657909847
CYR61; CTGF; PMAIP1; NKX3-1; SOX7;	GO:0043280~positive regulation of cysteine-type endopeptidase activity involved in apoptotic process	5	42	0.0106052024620005
CBFA2T3; THBS1; EGR1; NR4A2; CHRNA4; PGF; CXCR4; ANGPTL4; P2RX2;	GO:0001666~response to hypoxia	9	158	0.0110708844368572
GADD45B; PPP1R15A; GADD45G; TIAF1; MAP3K8; IER3; CXCR4; RHOB; ZFP36L1; FADD; PMAIP1; PHLDA2; ZC3H12A; USP17L2; TRIM69; TNS4; CSRNP1; PLK3;	GO:0006915~apoptotic process	18	530	0.0115044495838317
SOCS3; SOCS1; GADD45B; HSPB1; IL6; TAF7; TRIB1;	GO:0006469~negative regulation of protein kinase activity	7	97	0.012359285769125
DUSP1; DUSP2; DUSP8; DUSP5;	GO:0000188~inactivation of MAPK activity	4	25	0.0135333416171532
FGF19; CTGF; ID2; ZC3H12A; MYADM; NKX3-1; DLL4; NOCT;	GO:0010629~negative regulation of gene expression	8	131	0.0135333416171532
EDN1; CXCL8; EDN2; CXCR4; SPHK1;	GO:0019722~calcium-mediated signaling	5	46	0.0136526724287425
IL6; UBB; UBC; HSPA1A; HSPA1B; RIPK4; TRIM15; SPHK1;	GO:0051092~positive regulation of NF-kappaB transcription factor activity	8	133	0.0138096824176473
SNAI1; THBS1; HOXA5; S1PR1; CTGF; BAMBI; HES1; ARC; SRMS;	GO:0016477~cell migration	9	169	0.0144777531121183
GADD45B; GADD45G; MAP4K1;	GO:0000185~activation of MAPKKK activity	3	11	0.0162524827195997
GAS1; USP17L2; CHAC1;	GO:0010955~negative regulation of protein processing	3	11	0.0162524827195997
DLX2; NRARP; CHAC1; DLL4;	GO:0045746~negative regulation of Notch signaling pathway	4	28	0.0171606255797366
GADD45B; GADD45G; JUN; JUNB; JUND; CDC25A; ZNF703;	GO:0051726~regulation of cell cycle	7	108	0.0181909376338874
FOS; IL6; JUN; THBS1; FOSL1; JUNB; JUND; CCNO; PTGS2; PGF; FOSB; EMX1;	GO:0042493~response to drug	12	296	0.0183295611096295
CYR61; HSPA1A; HSPA1B; BMP4; CTGF;	GO:0060548~negative regulation of cell death	5	52	0.0183295611096295
ZFP36; ZFP36L1; ZC3H12A;	GO:0061158~3'-UTR-mediated mRNA destabilization	3	12	0.0183295611096295
ZFP36; ZFP36L1;	GO:0031086~nuclear-transcribed mRNA catabolic process, deadenylation-independent decay	2	2	0.0191251096129468
ZFP36; ZFP36L1;	GO:1904582~positive regulation of intracellular mRNA localization	2	2	0.0191251096129468
CXCL8; PGF; IL16;	GO:0050930~induction of positive chemotaxis	3	13	0.0201327926751797
GADD45B; GADD45G; HSP90B2P; MAP4K1; ERRFI1;	GO:0006950~response to stress	5	55	0.0209080797521856
CYR61; CXCL8; FOSL1; CXCL2; S1PR1; CCL20; CCL26;	GO:0006935~chemotaxis	7	117	0.0225580260580728
NOS1AP; TP53; EGR1; DUSP1; SOX9; GAS1; PMAIP1; USP17L2; SARM1;	GO:0042981~regulation of apoptotic process	9	189	0.0225580260580728
THBS1; FADD; PMAIP1;	GO:1902043~positive regulation of extrinsic apoptotic signaling pathway via death domain receptors	3	14	0.0225580260580728
HSPA1A; HSPA1B; NR4A2; ZC3H12A; CPEB2;	GO:0034599~cellular response to oxidative stress	5	57	0.0226045312964935
SOX9; ZFP36L1; NKX3-1; PLK3;	GO:0043491~protein kinase B signaling	4	33	0.0228294028100164
COL2A1; HSPA1A; HSPA1B; MCL1;	GO:2001240~negative regulation of extrinsic apoptotic signaling pathway in absence of ligand	4	33	0.0228294028100164
TP53; UBB; UBC; BTG2; PLK3;	GO:0006977~DNA damage response, signal transduction by p53 class mediator resulting in cell cycle arrest	5	60	0.024368774496887
SOCS3; SOCS1;	GO:0042512~negative regulation of tyrosine phosphorylation of Stat1 protein	2	3	0.024368774496887
DNAJA1; HSPH1;	GO:1903748~negative regulation of establishment of protein localization to mitochondrion	2	3	0.024368774496887
GADD45B; GADD45G; ZC3H12A;	GO:1900745~positive regulation of p38MAPK cascade	3	16	0.0261692588038922
THBS1; HSPA1A; HSPA1B; HSPA6;	GO:0034605~cellular response to heat	4	37	0.027736375969265
SOCS3; CRLF1; IL6; HES1;	GO:0042517~positive regulation of tyrosine phosphorylation of Stat3 protein	4	37	0.027736375969265
CDC42EP2; RGS16; FGF19; JUN; S1PR1; IL3RA; RGS2; CCL20; ACAP1; USP17L2; ARHGAP30; KLB; HBEGF; CYTH2; ERRFI1; CCL26; IRS2;	GO:0043547~positive regulation of GTPase activity	17	563	0.027736375969265
GADD45B; GADD45G; FGF19; CTGF; CCR7;	GO:0046330~positive regulation of JNK cascade	5	63	0.027736375969265
SMAD7; CBFA2T3; HSPA1A; ZFAND2A; TRIB1;	GO:0032436~positive regulation of proteasomal ubiquitin-dependent protein catabolic process	5	64	0.02902731145402
BAG3; FADD; DEDD2; TNFRSF18;	GO:0008625~extrinsic apoptotic signaling pathway via death domain receptors	4	38	0.0291726949356977
CXCR4; RHOB; PHLDA2; USP17L2; PARD6B;	GO:0030334~regulation of cell migration	5	67	0.0320798235219527
SMAD7; HSPA1A; HSPA1B; DNAJA1;	GO:0031397~negative regulation of protein ubiquitination	4	41	0.0339869892150681
HSPB1; UBB; UBC; HSPA1A; ZFP36; ZFP36L1;	GO:0043488~regulation of mRNA stability	6	101	0.034718009379294
NKX2-2; IL6; EDN1; FOSL1; PPRC1; TRIM15;	GO:0051091~positive regulation of sequence-specific DNA binding transcription factor activity	6	102	0.0361696924275911
FOS; JUN; BMP4;	GO:1902895~positive regulation of pri-miRNA transcription from RNA polymerase II promoter	3	20	0.0375042761468775
FGF19; UBB; UBC; ZFP36; IL3RA; ZFP36L1; DUSP5; KLB; HBEGF; IRS2;	GO:0000165~MAPK cascade	10	262	0.038230680168566
THBS1; UBB; UBC; CXCR4; DUSP5; AVPI1;	GO:0000187~activation of MAPK activity	6	105	0.03878693978183
IL6; HES1; IFNL1;	GO:0046427~positive regulation of JAK-STAT cascade	3	21	0.0395705416476702
IL6; DNAJA1; DNAJA4; DNAJB4;	GO:0009408~response to heat	4	45	0.04138615836178
CYR61; INSIG1; CBFA2T3; TP53; ACHE; CDC25A; CLK1; DLX5; ZFP36L1; USPL1; MAP4K1; IRS2;	GO:0008283~cell proliferation	12	358	0.0422978551319094
TBX3; ID2; TBX2;	GO:0090398~cellular senescence	3	22	0.0429238288915788
UBB; UBC; PTGER4; TRIB1;	GO:0007254~JNK cascade	4	46	0.0430936107414991
SMAD7; EDN1; SOX9; ZFP36L1;	GO:0071560~cellular response to transforming growth factor beta stimulus	4	49	0.0488117640982809
CRYAB; TP53; DCUN1D3; TSPYL2; SOX17; SERTAD3;	GO:0030308~negative regulation of cell growth	6	116	0.0494686545242937
HSPA1A; HSPA1B; FADD;	GO:0032757~positive regulation of interleukin-8 production	3	25	0.0494686545242937
ZFP36; ZFP36L1;	GO:0038066~p38MAPK cascade	2	7	0.0494686545242937

## Sheet: FaDu HT+RT
Genes	Process_name	Significant_genes_count	Total_genes_group_count	Padj-value
CBX4; OVOL1; SMAD7; TBX3; SNAI1; TNF; EDN1; UBB; UBC; BMP4; JUNB; JUND; EGR1; ATF3; S100A1; ZFP36; MSX1; MSX2; ID1; NR4A2; FOSB; BTG2; ID2; IRF8; DLX2; FOXF1; TBX2; HES1; HIC1; TAF7; PROX2; CRY2; NRARP; OSR2; NR4A3; FOXC2; CITED2; FZD8; PLK3; ZBTB20; DLL4; DDX20; FOXD3; ZNF281;	GO:0000122~negative regulation of transcription from RNA polymerase II promoter	44	707	0
CYR61; SMAD7; GALR2; MAFK; NKX2-2; FOS; TNF; IL6; EDN1; JUN; UBB; UBC; EGR2; BMP4; FOSL1; JUNB; JUND; EGR1; ATF3; EN2; HOXA5; IL11; S1PR1; NR4A1; MSX1; HOXC13; NR4A2; SOX9; SLC11A1; GBX2; FOSB; F2RL1; ESRRG; IRF8; NHLH1; POU3F1; DLX2; FOXF1; FADD; HES1; TAF7; PROX2; ZC3H12A; OSR2; MAFA; NR4A3; HSPH1; CSRNP1; NKX3-1; FOXC2; CITED2; FZD8; SERTAD1; FOXD3; CCNL1; MAFF; MAFB; KLF2;	GO:0045944~positive regulation of transcription from RNA polymerase II promoter	58	962	0
GADD45B; GADD45G; TNF; IL6; UBB; UBC; BMP4; FOSL1; HOXA5; GADD45A; DUSP1; DNAJA1; PTGS2; RHOB; FADD; PMAIP1; DCUN1D3; DDX20;	GO:0043065~positive regulation of apoptotic process	18	290	0.000108040759127326
BAG3; CRYAB; HSPA1A; HSPA1B; DNAJB1; HSPA1L; FKBP4; HSPH1; HSPB8;	GO:1900034~regulation of cellular response to heat	9	76	0.000470200164370614
FGF19; TNF; CTGF; ID2; ZC3H12A; MYADM; NKX3-1; CITED2; DLL4; NOCT; ZNF281;	GO:0010629~negative regulation of gene expression	11	131	0.000827623812356109
HSPA1A; HSPA1B; HSPA6; HSPA1L; DNAJA4;	GO:0042026~protein refolding	5	15	0.000827623812356109
GALR2; EDN1; EDN2; BDKRB2; CCR7; PTGER4; PTGER3; BDKRB1; F2RL1; CXCR4; C1QTNF1;	GO:0007204~positive regulation of cytosolic calcium ion concentration	11	133	0.00087541043974198
CXCL8; NR4A1; ZFP36; EGR3; ZFP36L1; DLL4;	GO:0044344~cellular response to fibroblast growth factor stimulus	6	29	0.000919880132490709
FOS; JUN; FOSL1; JUNB; JUND; DUSP1; FOSB;	GO:0051591~response to cAMP	7	47	0.00111463298207274
SPRY2; SEMA7A; FGF19; TNF; IL6; JUN; BMP4; CTGF; CCR7; F2RL1; CCL20; CCL26;	GO:0070374~positive regulation of ERK1 and ERK2 cascade	12	173	0.00150168879471934
WNT9A; SPRY2; CBFA2T3; IL6; JUN; CXCL8; BMP4; FOSL1; MSX1; PTGS2; MSX2; BTG2; IFNL1; NKX3-1; SOX7; DLL4; DDX20; ADAMTS1;	GO:0008285~negative regulation of cell proliferation	18	377	0.00178941067897631
SOCS3; WNT9A; JUN; JUNB; JUND; CTGF;	GO:0045597~positive regulation of cell differentiation	6	35	0.00178941067897631
SEMA7A; IGSF6; THBS1; CD7; CXCL8; CXCL2; CXCL3; IL32; CFP; CCR7; PTGER4; GEM; CCL20; IL1RL1; IRF8; IL16; CCL26; TNFRSF18;	GO:0006955~immune response	18	385	0.00212672023744689
JUN; CXCL8; S1PR1; SAT1; CTGF; PTGS2; ID1; PGF; RHOB; ZC3H12A; ADM2; FZD8; DLL4;	GO:0001525~angiogenesis	13	215	0.00215573883700523
HSPB1; NR4A1; GAS1; EGR3; DLL4;	GO:0035924~cellular response to vascular endothelial growth factor stimulus	5	22	0.0021948473332261
HSPA1A; HSPA1B; DNAJB1; DNAJA4;	GO:0090084~negative regulation of inclusion body assembly	4	10	0.0021948473332261
BAG3; TNF; FADD; DEDD2; DDX47; TNFRSF18;	GO:0008625~extrinsic apoptotic signaling pathway via death domain receptors	6	38	0.00222516316587906
GADD45B; GADD45G; TNF; GADD45A;	GO:0000185~activation of MAPKKK activity	4	11	0.00267694701281915
SMAD7; UBB; UBC; HSPA1A; BAMBI; VASN; LEMD3;	GO:0030512~negative regulation of transforming growth factor beta receptor signaling pathway	7	62	0.00331245827533974
CYR61; TNF; CTGF; PMAIP1; NKX3-1; SOX7;	GO:0043280~positive regulation of cysteine-type endopeptidase activity involved in apoptotic process	6	42	0.00331245827533974
SGK1; JUN; JUNB; JUND; CXCL2; CXCL3; SAT1; SOX9; USP17L2; SRMS; TNFRSF18;	GO:0042127~regulation of cell proliferation	11	168	0.00337060472437254
GADD45B; GADD45G; FGF19; GADD45A; CTGF; CCR7; F2RL1;	GO:0046330~positive regulation of JNK cascade	7	63	0.00337060472437254
UBB; UBC; SOX9; TBX2; HES1; NRARP; FOXC2; CHAC1; DLL4;	GO:0007219~Notch signaling pathway	9	112	0.00338912599878882
NKX2-2; THBS1; EGR1; CTGF; SARM1; MAFA; IRS2;	GO:0009749~response to glucose	7	66	0.00383888260921922
HSPA1A; HSPA1B; HSPA6;	GO:0070370~cellular heat acclimation	3	4	0.00395624610713136
JUN; JUNB; JUND; CDC25A; PLK3;	GO:0009314~response to radiation	5	29	0.0045638801133362
FOS; JUN; FOSL1; JUNB; JUND; MCL1;	GO:0034097~response to cytokine	6	48	0.00475802971645014
TNF; UBB; UBC; TNFAIP3; SPHK1;	GO:0010803~regulation of tumor necrosis factor-mediated signaling pathway	5	30	0.00510797857043278
SOCS3; SOCS1; GADD45B; HSPB1; IL6; GADD45A; TAF7; TRIB1;	GO:0006469~negative regulation of protein kinase activity	8	97	0.00531737191570322
EDN1; PTGS2; PCK1; ZFP36L1; PMAIP1; VASN; CPEB2; NKX3-1;	GO:0071456~cellular response to hypoxia	8	98	0.0054932245286154
GADD45B; GADD45G; GADD45A; ZC3H12A;	GO:1900745~positive regulation of p38MAPK cascade	4	16	0.00566069639137041
FOXI3; TBX3; FOXD2; MAFK; FOS; FOSL1; JUNB; JUND; KLF9; MAFA; TADA1; MED18; NFKBIZ; ZNF212; TCEAL9; MAFF; MAFB;	GO:0006357~regulation of transcription from RNA polymerase II promoter	17	403	0.00584811658971008
CBFA2T3; THBS1; EGR1; NR4A2; CHRNA4; PGF; UCP3; CXCR4; CITED2; P2RX2;	GO:0001666~response to hypoxia	10	158	0.0060313614367809
CYR61; HSPA1A; HSPA1B; BMP4; CTGF; CACYBP;	GO:0060548~negative regulation of cell death	6	52	0.0060313614367809
SGK1; GADD45B; PPP1R15A; GADD45G; TIAF1; TNFAIP3; GADD45A; MAP3K8; IER3; CXCR4; RHOB; ZFP36L1; FADD; PMAIP1; PHLDA2; ZC3H12A; USP17L2; CSRNP1; NUAK2; PLK3;	GO:0006915~apoptotic process	20	530	0.00633336514604753
TNF; SOX9; ZFP36L1; NKX3-1; PLK3;	GO:0043491~protein kinase B signaling	5	33	0.00633336514604753
TNF; COL2A1; HSPA1A; HSPA1B; MCL1;	GO:2001240~negative regulation of extrinsic apoptotic signaling pathway in absence of ligand	5	33	0.00633336514604753
CYR61; WNT9A; LHB; EDN1; ADRA2B; IL11; CTGF; PGF; EFNA4; CCL20; GPR50; PCDH19; PCDH12; CCL26;	GO:0007267~cell-cell signaling	14	298	0.00639877884961075
ZFP36; ID1; SOX9; ZFP36L1; ERRFI1;	GO:0071364~cellular response to epidermal growth factor stimulus	5	34	0.00654475615611995
TNF; IL6; UBB; UBC; HSPA1A; HSPA1B; RIPK4; TRIM15; SPHK1;	GO:0051092~positive regulation of NF-kappaB transcription factor activity	9	133	0.00673997326749953
BMP4; NR4A1; PTGS2; RHOB; TSPYL2;	GO:0045786~negative regulation of cell cycle	5	35	0.00715403476503261
SPRY2; TNF; IL6; THBS1; CCR7; HBEGF; C1QTNF1;	GO:0051897~positive regulation of protein kinase B signaling	7	81	0.00793394209214146
SNAI1; THBS1; HOXA5; S1PR1; CTGF; BDKRB1; BAMBI; HES1; ARC; SRMS;	GO:0016477~cell migration	10	169	0.0083039287184796
HSPB1; THBS1; CXCL8; PGF; RHOB; ZC3H12A; ADM2; SPHK1;	GO:0045766~positive regulation of angiogenesis	8	109	0.00834457902906561
CRYAB; UBB; UBC; MAP3K8;	GO:0051403~stress-activated MAPK cascade	4	21	0.0102884066534322
SMAD7; HSPA1A; HSPA1B; TNFAIP3; DNAJA1;	GO:0031397~negative regulation of protein ubiquitination	5	41	0.0122929292983078
SMAD7; FOS; JUN; UBB; UBC; ID1; BAMBI;	GO:0007179~transforming growth factor beta receptor signaling pathway	7	90	0.0127278117859074
ZSCAN12; MYCL; ESRRG; IRX5; IRX4; EMX1; EGR4; EGR3; ZFP36L1; MN1; ZNF155; IL16; HIC1; ZNF460; JMJD6; ZNF627; ZNF572; EID3; ZNF114; MAFA; ZNF606; ZKSCAN4; NKX3-1; HOXD1; TSPYL2; KLHL31; ZNF703; ZNF331; ALKBH4; ZNF624; ZNF212; SERTAD3; ZNF225; ZNF222; NOCT; MAFB;	GO:0006355~regulation of transcription, DNA-templated	36	1333	0.0142367425945895
SGK1; CXCR4; RHOB; PHLDA2; USP17L2; PARD6B;	GO:0030334~regulation of cell migration	6	67	0.0151865626847407
FGF19; TNF; UBB; UBC; ZFP36; IL3RA; ZFP36L1; GRIN2C; DUSP5; MAPK15; HBEGF; IRS2;	GO:0000165~MAPK cascade	12	262	0.0157597910454293
DUSP1; DUSP2; DUSP8; DUSP5;	GO:0000188~inactivation of MAPK activity	4	25	0.0157597910454293
CYR61; FGF19; TNF; BMP4; SOX9; PLAUR; FAM20A; NKX3-1;	GO:0001934~positive regulation of protein phosphorylation	8	124	0.0157597910454293
TNF; HSPA1A; HSPA1B; FADD;	GO:0032757~positive regulation of interleukin-8 production	4	25	0.0157597910454293
SPRY2; THBS1; SHISA2;	GO:0040037~negative regulation of fibroblast growth factor receptor signaling pathway	3	10	0.0157597910454293
SGK1; NOS1AP; INHBB; EGR1; DUSP1; SOX9; GAS1; PMAIP1; USP17L2; SARM1;	GO:0042981~regulation of apoptotic process	10	189	0.0157597910454293
TNF; UBB; UBC; PTGER4; TRIB1;	GO:0007254~JNK cascade	5	46	0.0165554874170237
EDN1; CXCL8; EDN2; CXCR4; SPHK1;	GO:0019722~calcium-mediated signaling	5	46	0.0165554874170237
TNF; TNFAIP3; ZC3H12A; KLF2;	GO:0032715~negative regulation of interleukin-6 production	4	26	0.0169232776963412
ZFP36; ID2; ZFP36L1; ZC3H12A; NOCT;	GO:0045600~positive regulation of fat cell differentiation	5	47	0.0176800644127218
GAS1; USP17L2; CHAC1;	GO:0010955~negative regulation of protein processing	3	11	0.0177625603690169
GALR2; IGSF6; EDN1; LAG3; EDN2; NPY1R; BDKRB2; GEM; FADD; GPR50; JMJD6; IL12RB2;	GO:0007166~cell surface receptor signaling pathway	12	269	0.0178250854202564
ZFP36; ZFP36L1;	GO:0031086~nuclear-transcribed mRNA catabolic process, deadenylation-independent decay	2	2	0.0198878507291099
THBS1; CFP; SPON1;	GO:0036066~protein O-linked fucosylation	3	12	0.0198878507291099
MSX1; PMAIP1; HIC1;	GO:0043517~positive regulation of DNA damage response, signal transduction by p53 class mediator	3	12	0.0198878507291099
DLX2; NRARP; CHAC1; DLL4;	GO:0045746~negative regulation of Notch signaling pathway	4	28	0.0198878507291099
ZFP36; ZFP36L1; ZC3H12A;	GO:0061158~3'-UTR-mediated mRNA destabilization	3	12	0.0198878507291099
UBB; MSX1;	GO:1902255~positive regulation of intrinsic apoptotic signaling pathway by p53 class mediator	2	2	0.0198878507291099
ZFP36; ZFP36L1;	GO:1904582~positive regulation of intracellular mRNA localization	2	2	0.0198878507291099
TNF; THBS1; UBB; UBC; CXCR4; DUSP5; AVPI1;	GO:0000187~activation of MAPK activity	7	105	0.0210707866449657
CRYAB; KCNC3; KCTD11; SCUBE1; KCNG3; C1QTNF1; KCNF1; KCND1; P2RX2;	GO:0051260~protein homooligomerization	9	172	0.0223640233122203
GADD45A; DUSP1; NKX3-1;	GO:0071850~mitotic cell cycle arrest	3	13	0.0223640233122203
GADD45B; GADD45G; JUN; JUNB; JUND; CDC25A; ZNF703;	GO:0051726~regulation of cell cycle	7	108	0.023162884889802
TNF; HSPB1; F2RL1;	GO:0043122~regulation of I-kappaB kinase/NF-kappaB signaling	3	14	0.0260322662031724
THBS1; FADD; PMAIP1;	GO:1902043~positive regulation of extrinsic apoptotic signaling pathway via death domain receptors	3	14	0.0260322662031724
SGK1; GADD45B; GADD45G; HSP90B2P; ERRFI1;	GO:0006950~response to stress	5	55	0.0262727529208543
SPRY2; ATF3; DUSP1; SPRY4; ERRFI1;	GO:0070373~negative regulation of ERK1 and ERK2 cascade	5	55	0.0262727529208543
SOCS3; SOCS1;	GO:0042512~negative regulation of tyrosine phosphorylation of Stat1 protein	2	3	0.0265459481947884
TBX3; FOSL1; NR4A3; CITED2;	GO:0045787~positive regulation of cell cycle	4	33	0.0265459481947884
DNAJA1; HSPH1;	GO:1903748~negative regulation of establishment of protein localization to mitochondrion	2	3	0.0265459481947884
HSPA1A; HSPA1B; NR4A2; ZC3H12A; CPEB2;	GO:0034599~cellular response to oxidative stress	5	57	0.0275837843797342
SPRY2; BMP4; DUSP1; RGS2;	GO:0043407~negative regulation of MAP kinase activity	4	35	0.0308537058698166
UBB; UBC; GADD45A; BTG2; PLK3;	GO:0006977~DNA damage response, signal transduction by p53 class mediator resulting in cell cycle arrest	5	60	0.0322162246819648
THBS1; IRS2;	GO:0010748~negative regulation of plasma membrane long-chain fatty acid transport	2	4	0.0340377609728111
THBS1; HSPA1A; HSPA1B; HSPA6;	GO:0034605~cellular response to heat	4	37	0.0340377609728111
LAG3; ZFP36;	GO:0045085~negative regulation of interleukin-2 biosynthetic process	2	4	0.0340377609728111
COL2A1; EIF4A1; ZFP36L1; PHLDA2; ZC3H12A; FAM46A;	GO:0010468~regulation of gene expression	6	92	0.0358170008974944
COL2A1; CTGF; SOX9;	GO:0001894~tissue homeostasis	3	18	0.0368529377713787
FOS; FOSL1; NR4A2;	GO:0031668~cellular response to extracellular stimulus	3	18	0.0368529377713787
SMAD7; CBFA2T3; HSPA1A; ZFAND2A; TRIB1;	GO:0032436~positive regulation of proteasomal ubiquitin-dependent protein catabolic process	5	64	0.0371866205192864
CLDN4; NKRF; ICOSLG; LHB; CXCL8; NR4A1; CHRNA3; NR4A2; CHRNA4; SOX9; PGF; GEM; CCL20; CD83; IL1RL1; PLAUR; SARM1; PLPPR3; GPRC5A; SLC22A17; HBEGF; DLL4; SPHK1; CDC42EP3; CCL26; RASD1; IRS2; TNFRSF18;	GO:0007165~signal transduction	28	1073	0.041549232487897
SPRY2; USP17L2; CPEB2; FICD;	GO:0034260~negative regulation of GTPase activity	4	41	0.0433086257719635
PPP1R15A; JUN;	GO:1990441~negative regulation of transcription from RNA polymerase II promoter in response to endoplasmic reticulum stress	2	5	0.0433086257719635
TNF; PTGS2; SPHK1;	GO:0042346~positive regulation of NF-kappaB import into nucleus	3	20	0.0447194819747915
FOS; JUN; BMP4;	GO:1902895~positive regulation of pri-miRNA transcription from RNA polymerase II promoter	3	20	0.0447194819747915
HSPB1; UBB; UBC; HSPA1A; ZFP36; ZFP36L1;	GO:0043488~regulation of mRNA stability	6	101	0.0493292068406452
IL6; HES1; IFNL1;	GO:0046427~positive regulation of JAK-STAT cascade	3	21	0.0493292068406452

## Sheet: SAS HT
Genes	Process_name	Significant_genes_count	Total_genes_group_count	Padj-value
OVOL1; TBX3; HOXA2; MAF; PRDM1; DKK1; SNAI1; EDN1; ZGLP1; UBB; UBC; GLI2; BMP4; ATF3; GATA2; ZFP36; HOXD9; MSX1; BCL6; NR4A2; CDKN1C; FOSB; ID2; ID3; DLX2; ANKRD1; TSHZ1; AEBP1; OSR2; CPEB3; DMBX1; NR4A3; DLX4; SIN3A; FOXC2; HES7; TXNIP; FZD8; DDX20; FOXD3;	GO:0000122~negative regulation of transcription from RNA polymerase II promoter	40	707	0
HOXA2; DLX3; TBX19; MAF; FOS; IL1A; IL1B; IL6; EDN1; JUN; ADRB2; ZGLP1; UBB; UBC; GLI2; EGR2; BMP4; FOSL2; ATF3; IL11; NR4A1; GATA2; HOXD9; MSX1; HOXC13; NR4A2; P2RY1; CEBPD; FOSB; MC1R; NHLH1; DLX2; ANKRD1; OSR2; MAFA; CREB3L4; NR4A3; HSPH1; CSRNP1; SIN3A; FOXC2; FZD8; SERTAD1; SIX4; FOXD3; MAFF; MAFB;	GO:0045944~positive regulation of transcription from RNA polymerase II promoter	47	962	0
ZNF670-ZNF695; ZNF500; IGF2; MYCL; ZNF19; ZNF10; HOXC9; HOXA1; AKAP17A; EMX1; ZNF155; ZNF792; LRIF1; ZNF697; ATF7IP2; KDM4D; JMJD6; ZNF852; ZNF574; ZNF572; GPBP1; ZNF227; ZNF761; EID3; ZNF557; ZBTB8B; ZNF784; MAFA; ZNF483; ZNF473; DLX4; LHX4; ZNF799; ZBTB45; ZNF681; ZNF436; TSPYL2; ZNF556; ZNFX1; ZNF624; NOCT; ZNF443; MAFB;	GO:0006355~regulation of transcription, DNA-templated	43	1333	0.000245920631469776
CACNA1G; GPR89B; TMEM37; HVCN1; KCNJ15; KCND1; CACNA2D2; HCN2; KCNH3; KCNJ14; KCNK7;	GO:0034765~regulation of ion transmembrane transport	11	111	0.000265389951077666
HSPA1A; HSPA1B; DNAJB1; DNAJB2; DNAJA4;	GO:0090084~negative regulation of inclusion body assembly	5	10	0.000265389951077666
OVOL1; DLX3; MAF; FOS; JUN; ZGLP1; GLI2; EGR2; ATF3; GATA2; MSX1; HOXC13; CEBPD; FOSB; NHLH1; DLX2; MAFA; CREB3L4; FOXC2; SIX4; NOCT; MAFF; MAFB;	GO:0006366~transcription from RNA polymerase II promoter	23	513	0.000399624359318348
BAG3; CRYAB; HSPA1A; HSPA1B; DNAJB1; HSPA1L; FKBP4; HSPH1; HSPB8;	GO:1900034~regulation of cellular response to heat	9	76	0.000439747420810654
FOS; JUN; DUSP1; OXTR; PGF; FOSB; UCP3;	GO:0032870~cellular response to hormone stimulus	7	42	0.000702226095647407
IL1A; IL1B; LRG1; HSPB1; HMOX1; CXCL8; GATA2; CHI3L1; PGF; ANGPT4;	GO:0045766~positive regulation of angiogenesis	10	109	0.00080948956267038
GADD45B; GADD45G; FGF19; IL1A; IL1B; CTGF; CARD9; PLCB1;	GO:0046330~positive regulation of JNK cascade	8	63	0.00080948956267038
COL1A1; IL6; EDN1; ICAM1; CXCL8; CCL2; ZFP36; CHI3L1; ANKRD1; CCL26;	GO:0071356~cellular response to tumor necrosis factor	10	108	0.00080948956267038
COL1A1; CRYAB; JUN; HMOX1; DUSP1; NR4A3; TXNIP;	GO:0042542~response to hydrogen peroxide	7	45	0.000839998500554559
MEFV; SEMA7A; FOS; IL1A; IL1B; IL6; CXCL1; CSF1; CXCL8; CCL2; TNFAIP3; CHI3L1; BCL6; BDKRB1; AOC3; SCUBE1; NFKBIZ; CCL26;	GO:0006954~inflammatory response	18	370	0.00104256467395073
IL6; EDN1; ICAM1; CXCL8; CCL2; CHI3L1; ANKRD1; CCL26;	GO:0071347~cellular response to interleukin-1	8	70	0.00123976196620204
IL1A; IL1B; COL2A1; HSPA1A; HSPA1B; MCL1;	GO:2001240~negative regulation of extrinsic apoptotic signaling pathway in absence of ligand	6	33	0.00139227714836099
CRYAB; JUN; HSPA1A; HSPA1B;	GO:0010941~regulation of cell death	4	9	0.00178585648099583
HSPA4L; BAG3; CRYAB; GNB3; DNAJA1; FKBP4; HSP90AA2P; DNLZ; LMAN2L; DNAJB4; HSPE1-MOB4;	GO:0006457~protein folding	11	160	0.00207147189841424
HMOX1; RAB3A; ARL4D; GEM; RRAD; RAB30; RASL11A; RHEBL1; RND1; ARL11; RAB7B; RASL11B; RASD1;	GO:0007264~small GTPase mediated signal transduction	13	225	0.00215263147445101
FOS; COL1A1; AMH; IL6; ICAM1; JUN; CCNO; HTR1D; OXTR; PGF; FOSB; EMX1; DUSP6; CARD9; TXNIP;	GO:0042493~response to drug	15	296	0.00218619714077936
HSPB1; CXCL1; HMOX1; CXCL8; DUSP1; CTGF; PLCD1; MC1R; PHKG1; TIAM2; RP1L1; DEDD2; WNK4; LAT2; TREM1; PLCB1; NUDT4;	GO:0035556~intracellular signal transduction	17	383	0.00312028995893832
IL1A; IL1B; IL6; HSPD1; RAB7B; CARD9;	GO:0032755~positive regulation of interleukin-6 production	6	43	0.00317410148654599
SEMA7A; FGF19; IL6; ICAM1; JUN; BMP4; CCL2; CTGF; CHI3L1; P2RY1; CCL26;	GO:0070374~positive regulation of ERK1 and ERK2 cascade	11	173	0.00317410148654599
IL6; DNAJA1; MICB; TRPV3; DNAJA4; DNAJB4;	GO:0009408~response to heat	6	45	0.00383433186690066
HSPA1A; HSPA1B; HSPA6;	GO:0070370~cellular heat acclimation	3	4	0.00446815576000681
COL1A1; CXCL8; CCL2; NR4A1; ZFP36;	GO:0044344~cellular response to fibroblast growth factor stimulus	5	29	0.00491454341775413
WNT9A; TBX19; PRDM1; GAS1; WNT2B; WNT6;	GO:0045165~cell fate commitment	6	48	0.00491454341775413
NR4A1; NR4A2; NR4A3;	GO:0071376~cellular response to corticotropin-releasing hormone stimulus	3	5	0.00649756941283761
BAG3; HSPA1A; HSPA1B; HSPD1; CLU; MSX1; DNLZ; NAA16; PIM2;	GO:0050821~protein stabilization	9	131	0.00700695767001739
GADD45B; GADD45G; AHSA1; HSP90AA2P; ZNF443; HILPDA;	GO:0006950~response to stress	6	55	0.0087973557806667
FOS; IL6; ADRB2; HSPD1; UCP3;	GO:0009409~response to cold	5	35	0.00931584130570614
IL1A; HMOX1; HSPA1A; HSPA1B; HSPA6;	GO:0034605~cellular response to heat	5	37	0.0113510639028872
TBX3; NKRF; JUN; BMP4; BCL6; CEBPD; CDKN1C; ID2; ID3; ZNF658; CIART; DMBX1; DEDD2; SIN3A; PLCB1; SIX4; RASD1; ZNF256;	GO:0045892~negative regulation of transcription, DNA-templated	18	484	0.0113510639028872
COL1A1; COL2A1; COL11A2; SERPINH1; FOXC2;	GO:0030199~collagen fibril organization	5	38	0.0124760508987964
PRDM1; IL1A; IL1B; AMH; IL6; CSF1; HSPA1A; HSPA1B; CTGF; ID2; OSR2; WNT6;	GO:0010628~positive regulation of gene expression	12	250	0.0132436844975443
CACNA1G; ATP2B3; SLC8B1; TRPV3; TMEM37; CHRNA10; CACNA2D2; CACFD1;	GO:0070588~calcium ion transmembrane transport	8	118	0.0142082460051966
IFIT3; WNT9A; IL1A; IL1B; IL6; JUN; CXCL1; CXCL8; BMP4; MSX1; BCL6; CDKN2C; PIM2; DDX20; ADAMTS1;	GO:0008285~negative regulation of cell proliferation	15	377	0.0156814093789665
WNT9A; LHB; IL1B; AMH; EDN1; ADRB2; IL11; CTGF; PGF; FJX1; HCN2; GUCA1B; CCL26;	GO:0007267~cell-cell signaling	13	298	0.0160286834642965
GPR89A; BCL10; IL1A; HMOX1; UBB; UBC; C18orf32; CARD9; PIM2;	GO:0043123~positive regulation of I-kappaB kinase/NF-kappaB signaling	9	157	0.0179608200507795
DUSP1; DUSP2; DUSP8; DUSP6;	GO:0000188~inactivation of MAPK activity	4	25	0.020437712176471
EDN1; CXCL8; P2RY11; LAT2; NUDT4;	GO:0019722~calcium-mediated signaling	5	46	0.0205737879880723
IL6; EDN1; IL11;	GO:0046888~negative regulation of hormone secretion	3	10	0.0205737879880723
EDN1; ICAM1; HMOX1; PMAIP1; ANKRD1; VASN; ANGPT4;	GO:0071456~cellular response to hypoxia	7	98	0.0205737879880723
FOS; COL1A1; JUN; DUSP1; FOSB;	GO:0051591~response to cAMP	5	47	0.0216610232850342
FOS; JUN; OXTR; MCL1; TMEM102;	GO:0034097~response to cytokine	5	48	0.0223524250916098
GPR89A; NKRF; TNFSF14; ICOSLG; RASSF9; LHB; IL1B; CXCL1; CXCL8; CHRNB1; FCGR1A; CCL2; NR4A1; CHRNA3; NR4A2; PGF; GEM; GABRE; AKAP17A; SYDE2; TMEM102; C18orf32; SLC22A17; ARRDC3; CHRNA10; PLCB1; CDC42EP3; CCL26; RASD1;	GO:0007165~signal transduction	29	1073	0.0234737875705445
GADD45B; CSPG5; GADD45G; CSF1; ZGLP1; CTGF; PGF; NHLH1; CSRP2; DUSP6; PKDCC; GGN; OSR2; TEX19; RBM24; CDHR5;	GO:0030154~cell differentiation	16	449	0.0234737875705445
GPR89A; GPR89B; CHRNA3; SLC9A3; CLDN15; SLC8B1; WNK4;	GO:0006811~ion transport	7	106	0.0243011650313717
CCL2; MCL1; DEDD2;	GO:0019725~cellular homeostasis	3	12	0.0243011650313717
CXCL8; CCL2; ATF3;	GO:0036499~PERK-mediated unfolded protein response	3	12	0.0243011650313717
MSX1; PMAIP1; ANKRD1;	GO:0043517~positive regulation of DNA damage response, signal transduction by p53 class mediator	3	12	0.0243011650313717
FOS; EDN1; JUN; FOSB; CACYBP;	GO:0071277~cellular response to calcium ion	5	50	0.0243011650313717
CTGF; OXTR;	GO:0034059~response to anoxia	2	2	0.0247425482805194
UBB; MSX1;	GO:1902255~positive regulation of intrinsic apoptotic signaling pathway by p53 class mediator	2	2	0.0247425482805194
SOCS1; HSPB1; STAT2; KDM4D;	GO:0001932~regulation of protein phosphorylation	4	30	0.0253003711302402
SOCS3; SOCS1; CCL2; STAT2;	GO:0007259~JAK-STAT cascade	4	30	0.0253003711302402
COL1A1; BMP4; MSX1; SIX4;	GO:0034504~protein localization to nucleus	4	30	0.0253003711302402
HSPA1A; HSPA1B; BMP4; CTGF; CACYBP;	GO:0060548~negative regulation of cell death	5	52	0.0253003711302402
JUN; HMOX1; CXCL8; CCL2; CTGF; PGF; PLCD1; EPHB3; FZD8; ANGPT4;	GO:0001525~angiogenesis	10	215	0.0257087963213831
ADRB2; CHRNA3; ANGPT4;	GO:0007171~activation of transmembrane receptor protein tyrosine kinase activity	3	13	0.0257087963213831
HSPD1; CLU; HSPA4;	GO:0051131~chaperone-mediated protein complex assembly	3	13	0.0257087963213831
AHSA1; RAB3A; DNAJB1; DNAJB2;	GO:0032781~positive regulation of ATPase activity	4	31	0.0259063716403526
HSPB1; HSPD1; CLU; DNAJB2; FKBP4;	GO:0061077~chaperone-mediated protein folding	5	54	0.0259063716403526
HLA-A; COL1A1; COL2A1; ICAM1; FCGR1A; BCL6; MICB; ULBP3; TREM1;	GO:0050776~regulation of immune response	9	180	0.025963096380042
SOCS3; SOCS1;	GO:0042512~negative regulation of tyrosine phosphorylation of Stat1 protein	2	3	0.0309438752176008
HSPA1A; HSPA1B;	GO:0070434~positive regulation of nucleotide-binding oligomerization domain containing 2 signaling pathway	2	3	0.0309438752176008
BAG3; IL1A; IL1B; MCL1;	GO:0097192~extrinsic apoptotic signaling pathway in absence of ligand	4	34	0.0309438752176008
DNAJA1; HSPH1;	GO:1903748~negative regulation of establishment of protein localization to mitochondrion	2	3	0.0309438752176008
TNFSF14; GADD45B; PPP1R15A; GADD45G; TIAF1; IL1A; IL1B; TNFAIP3; CHI3L1; IER3; PMAIP1; THOC6; TMEM102; CSRNP1; CARD6; PIM2; ZNF443;	GO:0006915~apoptotic process	17	530	0.031752217661533
TIAF1; BCL10; UBB; UBC; CARD9;	GO:0007249~I-kappaB kinase/NF-kappaB signaling	5	59	0.0321473590238709
UPK1A; LILRB3; EDN1; ADRB2; CCL2; LAG3; LAMA1; OXTR; P2RY1; GEM; JMJD6;	GO:0007166~cell surface receptor signaling pathway	11	269	0.0328418636031462
IL1B; BMP4; DUSP1; RGS2;	GO:0043407~negative regulation of MAP kinase activity	4	35	0.0328418636031462
SOCS3; WNT9A; JUN; CTGF;	GO:0045597~positive regulation of cell differentiation	4	35	0.0328418636031462
HSPA1A; HSPA1B; DNAJB2;	GO:0031396~regulation of protein ubiquitination	3	16	0.0343798662191303
UBB; UBC; HSPA1A; VASN; RASL11B;	GO:0030512~negative regulation of transforming growth factor beta receptor signaling pathway	5	62	0.0367006690820606
IL1B; EDN1; ANKRD1; ACER2; ADSSL1;	GO:0035690~cellular response to drug	5	62	0.0367006690820606
SOCS3; SOCS1; IL1A; IL1B; IL6; CCL2; IL11RA;	GO:0019221~cytokine-mediated signaling pathway	7	124	0.0368936076720192
HOXA2; GATA2; MCL1;	GO:0001709~cell fate determination	3	17	0.037415736692896
TBX3; FGF19; SLC25A27; IGF2; IL6; EDN1; CSF1; ATF3; IL11; CTGF; PGF; ACER2; OSR2; SERTAD1; HILPDA;	GO:0008284~positive regulation of cell proliferation	15	454	0.0381372086460742
WNT9A; ID3; NNAT; WNT2B; FZD8; WNT6;	GO:0030182~neuron differentiation	6	94	0.0381372086460742
BMP4; WNT6;	GO:0060684~epithelial-mesenchymal cell signaling	2	4	0.0381372086460742
IFIT2; HSPD1; MCL1;	GO:0008637~apoptotic mitochondrial changes	3	18	0.0391242864985897
SOCS3; SOCS1; GADD45B; HSPB1; IL6; TRIB2;	GO:0006469~negative regulation of protein kinase activity	6	97	0.0413538358497033
HSPA1A; HSPA1B; TNFAIP3; DNAJA1;	GO:0031397~negative regulation of protein ubiquitination	4	41	0.044389214317895
EDN1; GATA2; OXTR; BDKRB1; P2RY1; CHRNA10; GPR35;	GO:0007204~positive regulation of cytosolic calcium ion concentration	7	133	0.0446964518938899
BMP4; CDKN2C; CDKN1C;	GO:0042326~negative regulation of phosphorylation	3	20	0.046126203408332
HSPB1; UBB; UBC; HSPA1A; ZFP36; RBM24;	GO:0043488~regulation of mRNA stability	6	101	0.046126203408332
CXCL1; CXCL8; CCL2; GPR35; CCL26;	GO:0070098~chemokine-mediated signaling pathway	5	69	0.046126203408332
FOS; JUN; BMP4;	GO:1902895~positive regulation of pri-miRNA transcription from RNA polymerase II promoter	3	20	0.046126203408332
PPP1R15A; JUN;	GO:1990441~negative regulation of transcription from RNA polymerase II promoter in response to endoplasmic reticulum stress	2	5	0.046126203408332

## Sheet: SAS HT+RT
Genes	Process_name	Significant_genes_count	Total_genes_group_count	Padj-value
OVOL1; TBX3; HOXA2; KLF4; MITF; MAF; PRDM1; DNAJB5; DKK1; SNAI1; EDN1; ZGLP1; UBB; UBC; GLI2; BMP4; ATF3; GATA2; ZFP36; MSX1; BCL6; NR4A2; CDKN1C; UBE2D1; FOSB; FOXA1; ID2; ID3; MXD1; DLX2; FOXF1; ANKRD1; TSHZ1; AEBP1; OSR2; CPEB3; DMBX1; NR4A3; FOXJ1; DLX4; PRMT6; SIN3A; FOXC2; CITED2; HES7; TXNIP; DACT1; FOXD3; HEY1;	GO:0000122~negative regulation of transcription from RNA polymerase II promoter	49	707	0
TBX3; NKRF; HOXA2; ZNF500; TBX19; PRDM1; ZNF17; ZNF19; ZNF10; GATA2; HOXC9; BCL6; NR4A2; HOXA1; STAT2; IRX5; ID2; ID3; MXD1; ZNF844; ZNF460; NAB2; ZNF792; ZNF394; LRIF1; ZNF697; ZNF658; ATF7IP2; ZNF772; KDM4D; JMJD6; RASL11A; TSHZ1; ZNF572; GPBP1; ZNF227; ZNF761; AEBP1; EID3; CIART; ZNF557; ZBTB8B; ZNF784; TET1; DMBX1; DEDD2; LHX4; TADA1; ZNF799; ZBTB45; PRMT6; ZNF778; CSRNP1; SIN3A; CITED2; HES7…	GO:0006351~transcription, DNA-templated	71	1791	0
TLR4; HOXA2; KLF4; DLX3; TBX19; MITF; MAF; FOS; IL1A; IL6; EDN1; JUN; ADRB2; INHBA; ZGLP1; UBB; UBC; GLI2; EGR2; BMP4; ATF3; IL11; NR4A1; GATA2; MSX1; HOXC13; NR4A2; P2RY1; CEBPD; FOSB; UCN; FOXA1; MC1R; NHLH1; DLX2; FOXF1; FADD; ANKRD1; OSR2; TET1; MAFA; CREB3L4; NR4A3; HSPH1; FOXJ1; CSRNP1; SIN3A; FOXC2; CITED2; GATA5; NOD2; SERTAD1; SIX4; FOXD3; MAFF; HEY1; MAFB;	GO:0045944~positive regulation of transcription from RNA polymerase II promoter	57	962	0
BAG3; CRYAB; HSPA1A; HSPA1B; DNAJB1; HSPA1L; FKBP4; HSPH1; CHORDC1; HSPB8;	GO:1900034~regulation of cellular response to heat	10	76	0.000110455689808608
TLR4; IL1A; IL6; HSPD1; UCN; RAB7B; CARD9; NOD2;	GO:0032755~positive regulation of interleukin-6 production	8	43	0.000128051067882636
TLR4; GADD45B; GADD45G; FGF19; IL1A; CTGF; CARD9; NOD2; PLCB1;	GO:0046330~positive regulation of JNK cascade	9	63	0.000184994286606854
GPR89A; NKRF; TNFSF14; ICOSLG; LRRN2; RASSF9; LHB; LTA; CXCL1; CXCL8; CHRM1; CHRNB1; FCGR1A; CCL2; NTF3; NR4A1; CXCR2; CHRNA3; NR4A2; PGF; GEM; GABRE; CCL20; IL1RL1; AKAP17A; CHRNE; GKAP1; SYDE2; NOSTRIN; C18orf32; SLC22A17; ARRDC3; RADIL; PLCB1; TNFRSF10D; ASIC3; CDC42EP3; CCL26; RASD1;	GO:0007165~signal transduction	39	1073	0.000196718735014161
COL1A1; IL6; EDN1; ICAM1; CXCL8; CCL2; ZFP36; CHI3L1; CCL20; ANKRD1; CCL26;	GO:0071356~cellular response to tumor necrosis factor	11	108	0.000227849544400416
HSPA1A; HSPA1B; DNAJB1; DNAJB2; DNAJA4;	GO:0090084~negative regulation of inclusion body assembly	5	10	0.000227849544400416
IL1A; LRG1; HSPB1; HMOX1; CXCL8; ALOX12; GATA2; CHI3L1; PGF; RHOB; ANGPT4;	GO:0045766~positive regulation of angiogenesis	11	109	0.000237541983287164
IL6; EDN1; ICAM1; CXCL8; CCL2; CHI3L1; CCL20; ANKRD1; CCL26;	GO:0071347~cellular response to interleukin-1	9	70	0.000301563172277364
TLR4; KLF4; MITF; PRDM1; IL1A; IL6; INHBA; CSF1; HSPA1A; HSPA1B; ALOX12; CTGF; ID2; OSR2; CITED2; WNT6;	GO:0010628~positive regulation of gene expression	16	250	0.000331604724986298
TLR4; FGF19; IL6; ICAM1; JUN; BMP4; CCL2; CTGF; CHI3L1; P2RY1; CCL20; NOD2; CCL26;	GO:0070374~positive regulation of ERK1 and ERK2 cascade	13	173	0.00049825740093204
FOS; JUN; DUSP1; OXTR; PGF; FOSB; UCP3;	GO:0032870~cellular response to hormone stimulus	7	42	0.000676887005903414
IL6; DNAJA1; MICB; TRPV3; DNAJA4; DNAJB4; ASIC3;	GO:0009408~response to heat	7	45	0.000881739957342712
TBX3; NKRF; KLF4; JUN; BMP4; BCL6; CEBPD; CDKN1C; ID2; ID3; ZNF658; NOSTRIN; CIART; DMBX1; DEDD2; PRMT6; SIN3A; CITED2; PLCB1; SIX4; RASD1; HEY1;	GO:0045892~negative regulation of transcription, DNA-templated	22	484	0.000881739957342712
DNAJB5; HSPA4L; BAG3; CRYAB; DNAJA1; FKBP4; HSP90AA2P; DNLZ; LMAN2L; DNAJB4; NUDC; HSPE1-MOB4;	GO:0006457~protein folding	12	160	0.000910996519377444
WNT9A; TBX19; PRDM1; GAS1; WNT2B; GATA5; WNT6;	GO:0045165~cell fate commitment	7	48	0.00118969547439273
CRYAB; JUN; HSPA1A; HSPA1B;	GO:0010941~regulation of cell death	4	9	0.00183066509778884
INHBA; BMP4; NR4A1; PTGS2; RHOB; TSPYL2;	GO:0045786~negative regulation of cell cycle	6	35	0.00183066509778884
LILRB3; EDN1; ADRB2; INHBA; CCL2; LAG3; CXCR2; LAMA1; OXTR; P2RY1; GEM; FADD; JMJD6; GPR83; CLEC2D;	GO:0007166~cell surface receptor signaling pathway	15	269	0.00183086396738576
IL1A; HMOX1; HSPA1A; HSPA1B; HSPA6; SLC52A3;	GO:0034605~cellular response to heat	6	37	0.00222940748694036
TBX3; FGF19; IGF2; IL6; EDN1; CSF1; CHRM1; ALOX12; ATF3; NTF3; IL11; CXCR2; CTGF; PGF; BAMBI; ACER2; OSR2; TET1; SERTAD1; HILPDA;	GO:0008284~positive regulation of cell proliferation	20	454	0.00228321542517816
JUN; HMOX1; CXCL8; CCL2; CTGF; PTGS2; NOV; PGF; PLCD1; EPHB3; RHOB; ANGPT4; HEY1;	GO:0001525~angiogenesis	13	215	0.00245414086264717
GPR89A; BCL10; IL1A; HMOX1; UBB; UBC; FADD; C18orf32; CARD9; NOD2; PIM2;	GO:0043123~positive regulation of I-kappaB kinase/NF-kappaB signaling	11	157	0.00260947668019867
TLR4; HSPA1A; HSPA1B;	GO:0070434~positive regulation of nucleotide-binding oligomerization domain containing 2 signaling pathway	3	3	0.00273769855122344
FRAT2; IL1A; KRT16; CXCL1; CSF1; GLI2; CHRM1; ACHE; CLK1; MXD1; NAB2; USPL1; FAM83A; CITED2; PIM2; NUDC; LIPG;	GO:0008283~cell proliferation	17	358	0.00292814662304273
TLR4; HSPA1A; HSPA1B; FADD; NOD2;	GO:0032757~positive regulation of interleukin-8 production	5	25	0.00324801593570601
HSPA1A; HSPA1B; HSPA6;	GO:0070370~cellular heat acclimation	3	4	0.00402309677502855
GADD45B; CSPG5; GADD45G; INHBA; CSF1; ZGLP1; CTGF; PGF; RHOB; NHLH1; CSRP2; DUSP6; PKDCC; GGN; OSR2; TEX19; CITED2; RBM24; CDHR5;	GO:0030154~cell differentiation	19	449	0.00407249024261656
CRYAB; INHBA; MSX1; BCL6; CDKN2C; BDKRB1; NOV; SESN2; TSPYL2;	GO:0030308~negative regulation of cell growth	9	116	0.00429582178942585
GATA2; BCL6; DLX2; CHAC1; HEY1;	GO:0045746~negative regulation of Notch signaling pathway	5	28	0.00433054973193571
VGF; FOS; COL1A1; JUN; DUSP1; FOSB;	GO:0051591~response to cAMP	6	47	0.00482842347507744
COL1A1; CXCL8; CCL2; NR4A1; ZFP36;	GO:0044344~cellular response to fibroblast growth factor stimulus	5	29	0.00488719979114502
CXCL1; CXCL8; CCL2; CXCR2; CCL20; GPR35; CCL26;	GO:0070098~chemokine-mediated signaling pathway	7	69	0.00499226220320188
SOCS1; HSPB1; STAT2; SESN2; KDM4D;	GO:0001932~regulation of protein phosphorylation	5	30	0.0054249370443914
SOCS3; MEFV; KLF4; TNFAIP3; NOV; FOXF1; METRNL;	GO:0050728~negative regulation of inflammatory response	7	73	0.00638453278857866
EDN1; ICAM1; HMOX1; PTGS2; PMAIP1; ANKRD1; VASN; ANGPT4;	GO:0071456~cellular response to hypoxia	8	98	0.00638453278857866
HSPA1A; HSPA1B; BMP4; CTGF; NOV; CACYBP;	GO:0060548~negative regulation of cell death	6	52	0.00707769402401115
IL1A; COL2A1; HSPA1A; HSPA1B; MCL1;	GO:2001240~negative regulation of extrinsic apoptotic signaling pathway in absence of ligand	5	33	0.00744418194945903
HMOX1; ARL4A; GEM; RRAD; RAB30; RASL11A; ARHGAP30; RHEBL1; RND1; RAB7B; RASL11B; RASD1;	GO:0007264~small GTPase mediated signal transduction	12	225	0.00813906243314526
BAG3; HSPA1A; HSPA1B; HSPD1; CLU; MSX1; DNLZ; NAA16; PIM2;	GO:0050821~protein stabilization	9	131	0.00813906243314526
HSPB1; HSPD1; CLU; DNAJB2; FKBP4; CHORDC1;	GO:0061077~chaperone-mediated protein folding	6	54	0.00813906243314526
GADD45B; GADD45G; AHSA1; HSP90AA2P; ZNF443; HILPDA;	GO:0006950~response to stress	6	55	0.00856542148997564
TNFSF14; GADD45B; PPP1R15A; GADD45G; TIAF1; LTA; IL1A; TNFAIP3; CHI3L1; IER3; RHOB; FADD; PMAIP1; C3orf38; THOC6; CSRNP1; CARD6; BEX2; PIM2; ZNF443;	GO:0006915~apoptotic process	20	530	0.00892944715720843
GPR89A; GPR89B; CHRNA3; CLDN15; SLC8B1; WNK4; SLC26A1; SLC12A7;	GO:0006811~ion transport	8	106	0.00921344581925704
IFIT3; WNT9A; KLF4; IL1A; IL6; JUN; INHBA; CXCL1; CXCL8; BMP4; MSX1; PTGS2; BCL6; CDKN2C; PIM2; ADAMTS1;	GO:0008285~negative regulation of cell proliferation	16	377	0.00978917651794155
INHBA; BMP4; CDKN2C; CDKN1C;	GO:0042326~negative regulation of phosphorylation	4	20	0.0107380645517755
TLR4; TIAF1; BCL10; UBB; UBC; CARD9;	GO:0007249~I-kappaB kinase/NF-kappaB signaling	6	59	0.0110970637706483
HSPB1; CXCL1; HMOX1; CXCL8; DUSP1; CTGF; PLCD1; MC1R; PHKG1; RP1L1; DEDD2; WNK4; NOD2; TREM1; PLCB1; NUDT4;	GO:0035556~intracellular signal transduction	16	383	0.0110970637706483
UBB; UBC; FOXA1; FOXC2; CHAC1; HES7; ANGPT4; HEY1;	GO:0007219~Notch signaling pathway	8	112	0.0120265683052052
HAP1; CPEB4; CPEB3;	GO:2000766~negative regulation of cytoplasmic translation	3	8	0.0121389823049872
UBB; UBC; HSPA1A; BAMBI; VASN; RASL11B;	GO:0030512~negative regulation of transforming growth factor beta receptor signaling pathway	6	62	0.0131182434734326
IL6; JUN; GLI2; UCN; CACYBP;	GO:0045740~positive regulation of DNA replication	5	40	0.0131182434734326
HLA-A; COL1A1; COL2A1; ICAM1; FCGR1A; BCL6; MICB; ULBP3; TREM1; CLEC2D;	GO:0050776~regulation of immune response	10	180	0.0152245654732299
SNAI1; COL1A1; EDN1; CSF1; ALOX12; NTF3; FOXF1; FERMT3; SEMA6C; CCL26;	GO:0030335~positive regulation of cell migration	10	183	0.0167691732556715
TLR4; CLU; FADD; CARD9; NOD2;	GO:0032760~positive regulation of tumor necrosis factor production	5	43	0.0167691732556715
UBB; UBC; TNFAIP3; NOD2;	GO:0070423~nucleotide-binding oligomerization domain containing signaling pathway	4	24	0.0167876073777898
BCL10; G0S2; FADD; DEDD2;	GO:2001238~positive regulation of extrinsic apoptotic signaling pathway	4	24	0.0167876073777898
PPP1R15A; RASL11A; PHF8;	GO:0045943~positive regulation of transcription from RNA polymerase I promoter	3	10	0.0179373523649259
DUSP1; DUSP2; DUSP8; DUSP6;	GO:0000188~inactivation of MAPK activity	4	25	0.0184781197197929
MITF; NTF3; DUSP1; BCL6; GAS1; PMAIP1; CARD6; BEX2; CARD9; TNFRSF10D;	GO:0042981~regulation of apoptotic process	10	189	0.0198002252327328
EDN1; CXCL8; MCU; P2RY11; NUDT4;	GO:0019722~calcium-mediated signaling	5	46	0.0202630065946582
VGF; IL6; FOXA1; SESN3; KCNB1; SLC8B1; MCU;	GO:0042593~glucose homeostasis	7	98	0.0209772668291354
CCL2; MCL1; DEDD2;	GO:0019725~cellular homeostasis	3	12	0.022793710267336
CXCL8; CCL2; ATF3;	GO:0036499~PERK-mediated unfolded protein response	3	12	0.022793710267336
MSX1; PMAIP1; ANKRD1;	GO:0043517~positive regulation of DNA damage response, signal transduction by p53 class mediator	3	12	0.022793710267336
UBB; MSX1;	GO:1902255~positive regulation of intrinsic apoptotic signaling pathway by p53 class mediator	2	2	0.022793710267336
FOS; EDN1; JUN; FOSB; CACYBP;	GO:0071277~cellular response to calcium ion	5	50	0.0240337502399556
TLR4; UBB; UBC; NTF3; DUSP6; AVPI1; NOD2;	GO:0000187~activation of MAPK activity	7	105	0.0256416575826288
ADRB2; CHRNA3; ANGPT4;	GO:0007171~activation of transmembrane receptor protein tyrosine kinase activity	3	13	0.0256416575826288
SOCS3; SOCS1; CCL2; STAT2;	GO:0007259~JAK-STAT cascade	4	30	0.0256416575826288
COL1A1; BMP4; MSX1; SIX4;	GO:0034504~protein localization to nucleus	4	30	0.0256416575826288
CXCL8; NTF3; PGF;	GO:0050930~induction of positive chemotaxis	3	13	0.0256416575826288
HSPD1; CLU; HSPA4;	GO:0051131~chaperone-mediated protein complex assembly	3	13	0.0256416575826288
BCL10; CRYAB; HMOX1; KCNB1; KCTD11; SCUBE1; SPTBN5; KCND1; P2RX2;	GO:0051260~protein homooligomerization	9	172	0.0279046193793364
MSX1; SIN3A; HEY1;	GO:2000678~negative regulation of transcription regulatory region DNA binding	3	14	0.0292861842376112
TBX3; TBX19; MAF; FOS; INHBA; STAT2; TSHZ1; MAFA; TADA1; NFKBIZ; FOXQ1; MED11; TCEAL9; MAFF; MAFB;	GO:0006357~regulation of transcription from RNA polymerase II promoter	15	403	0.0295087241004321
NOD2; TREM1;	GO:0002374~cytokine secretion involved in immune response	2	3	0.0296787899136619
CRYAB; MAP1B;	GO:0032387~negative regulation of intracellular transport	2	3	0.0296787899136619
TLR4; PRDM1; BCL10; IGHG4; KRT16; CSF1; UBB; UBC; CLU; TRIM26; FADD; TRIM15; CARD9; NOD2; TREM1;	GO:0045087~innate immune response	15	404	0.0296787899136619
TLR4; KLF4; ATF3; DUSP1; DUSP6;	GO:0070373~negative regulation of ERK1 and ERK2 cascade	5	55	0.0296787899136619
DNAJA1; HSPH1;	GO:1903748~negative regulation of establishment of protein localization to mitochondrion	2	3	0.0296787899136619
MST1; SESN2;	GO:2000479~regulation of cAMP-dependent protein kinase activity	2	3	0.0296787899136619
ALOX12; CTGF; SESN2; PMAIP1;	GO:0072593~reactive oxygen species metabolic process	4	33	0.0304196673264888
ICAM1; HMOX1; TNFAIP3; FADD;	GO:1902042~negative regulation of extrinsic apoptotic signaling pathway via death domain receptors	4	33	0.0304196673264888
KLF4; INHBA; CSF1;	GO:0032270~positive regulation of cellular protein metabolic process	3	15	0.0308494212126964
CCL2; UCN; TRPV3;	GO:0090280~positive regulation of calcium ion import	3	15	0.0308494212126964
BAG3; IL1A; MCL1; FADD;	GO:0097192~extrinsic apoptotic signaling pathway in absence of ligand	4	34	0.0323286121564564
HSPA1A; HSPA1B; DNAJB2;	GO:0031396~regulation of protein ubiquitination	3	16	0.0346335107872293
SOCS3; WNT9A; JUN; CTGF;	GO:0045597~positive regulation of cell differentiation	4	35	0.0347325684601503
TNFAIP3; PTGS2; BCL6; ACE2; NOD2;	GO:0050727~regulation of inflammatory response	5	59	0.034871594192219
HOXA2; GATA2; MCL1;	GO:0001709~cell fate determination	3	17	0.0366698365533938
UBB; UBC; UBE2D1; FBXL14; ABTB2; C18orf25; KLHL15; KLHL25;	GO:0042787~protein ubiquitination involved in ubiquitin-dependent protein catabolic process	8	153	0.0366698365533938
LAG3; ZFP36;	GO:0045085~negative regulation of interleukin-2 biosynthetic process	2	4	0.0366698365533938
BMP4; WNT6;	GO:0060684~epithelial-mesenchymal cell signaling	2	4	0.0366698365533938
CACNA1G; GRIN3B; SLC8B1; TRPV3; TMEM37; CACNA2D2; CACFD1;	GO:0070588~calcium ion transmembrane transport	7	118	0.0366698365533938
SESN2; SESN3;	GO:1901031~regulation of response to reactive oxygen species	2	4	0.0366698365533938
BAG3; FADD; DEDD2; TNFRSF10D;	GO:0008625~extrinsic apoptotic signaling pathway via death domain receptors	4	38	0.0407193980315896
IFIT2; HSPD1; MCL1;	GO:0008637~apoptotic mitochondrial changes	3	18	0.0407193980315896
CCNO; RGS2; AVPI1; KCTD11; BEX2; PARD6G; TSPYL2; TXNIP; SMPD3;	GO:0007049~cell cycle	9	196	0.0454569568923419
DDAH2; MAFA; RASD1;	GO:0007263~nitric oxide mediated signal transduction	3	19	0.0454569568923419
CHRM1; P2RY1;	GO:0043270~positive regulation of ion transport	2	5	0.0458717258206299
PPP1R15A; JUN;	GO:1990441~negative regulation of transcription from RNA polymerase II promoter in response to endoplasmic reticulum stress	2	5	0.0458717258206299
HSPA1A; HSPA1B; TNFAIP3; DNAJA1;	GO:0031397~negative regulation of protein ubiquitination	4	41	0.0473261973388493
SOCS3; SOCS1; GADD45B; HSPB1; IL6; TRIB2;	GO:0006469~negative regulation of protein kinase activity	6	97	0.0481572265262432
FOS; JUN; BMP4;	GO:1902895~positive regulation of pri-miRNA transcription from RNA polymerase II promoter	3	20	0.0481572265262432
